# Supplementary material
Source: publisher site journal article supplement (https://www.dovepress.com/article/341480)
Supplement: Supplementary file 1 [file get_supplementary_file.php]

Mapping outcomes and registries in current Danish pharmacoepidemiological research

Supplementary material

**Table of content**

[**Table S1** Overview of content, coverage and data holder/permission authority of Danish registries identified as outcome data sources in review. 2](#_Toc95913635)

[**Table S2** Search strategies1 in PubMed and Scopus 20](#_Toc95913636)

[**Table S3** List of the 210 included studies in the systematic mapping review 21](#_Toc95913637)

[**Table S4** Study overview of included studies. 35](#_Toc95913638)

[**Table S5** Overview of diagnosis categories reported in the 138 studies using “Diagnosis” as outcome subcategory 36](#_Toc95913639)

# **Table S1** Overview of content, coverage and data holder/permission authority of Danish registries identified as outcome data sources in review.

| **Name of registry** | **Description** | **Coverage**† | **Quality refer­ences*** |
| --- | --- | --- | --- |
| *Data holder/permission authority*:Danish Health Data Authority or Statistics Denmark | | | |
| **Danish Central Person Registry**1 | Information on all Danish citizens incl. date and place of birth, civil status, place of residence, immigration and emigration, vital status, as well as information on parents and children. | 1968- | 1–3 |
| **Danish Causes of Death Registry**4 | Information on all deceased Danish citizens with data on date, place and manner of death, cause of death (underlying and contributing) classified based on death certificates and 10th revision of the International Classification of Diseases (ICD-10), and physician issuing the death certificate. | 1943- | 4–8 |
| **Danish National Patient Registry**9 | Information on all patients in contact with Danish hospitals or special clinics incl. data on diagnoses (primary and secondary) coded based on the 8th revision (up to 1994) and 10th revision of the International Classification of Diseases (ICD-8 or -10), admissions, outpatient visits, emergency, length of treatment, treatments (e.g., surgeries), and examinations. | 1977- | 7,9–41 |
| **Danish National Prescription Registry/Registry of Medicinal Products Statistics**42 | Information on all redeemed prescriptions from Danish community pharmacies incl. data such as date of redemption, Anatomical Therapeutic Chemical classification (ATC) code, package size, prescriber, etc. The Danish National Prescription Registry is a sub-registry of the Registry of Medicinal Products Statistics. | 1995- | 43–49 |
| **Danish National Health Insurance Service Registry**50 | Information on type of services (type of consultation e.g., ordinary or telephone consultation; additional services e.g., performing psychometric tests; or laboratory tests, e.g., lung function test) provided by general practitioners, specialist doctors in private practices, dentists, physiotherapists, podiatrists, and psychologists covered the National Health Insurance System. Contain minimal clinical information. | 1990- | 50 |
| **Danish Psychiatric Central Research Registry**51 | Information on all patients with contacts (admissions, outpatient, and emergency) to psychiatric hospitals and departments. Includes patients from Denmark (from 1969), the Faroe Islands (from 1973) and Greenland (from 1979). Since 1995, the psychiatric central research registry (only Danish patients) has also become an integrated sub-registry in the Danish National Patient Registry. | 1969-*** | 23,31,40,51–56 |
| **Danish Medical Birth Registry**57 | Information on all births (live and stillborn) by women residing in Denmark incl. data such as date and place of birth, identification of mother/father, maternal information, variables related to pregnancy and delivery (e.g., complications, labor induction, cesarean section), infant information (e.g., gestational age, malformations, postpartum mortality (within 12 months)). | 1973- | 27,41,57,58 |
| **Danish in Vitro Fertilization Registry**59 | Information on all women who have initiated fertility treatment at Danish fertility clinics incl. data on cause of infertility, type of treatment, outcome of treatment, and children born on fertility treatment. | 1994- | 59,60 |
| **Registry of Legally Induced Abortions**59 | Information on all women who have induced abortions such as method used, complications, previous pregnancies, and their outcome. From 1995, information on induced abortions were captured in the Danish National Patient Registry. | 1973-1994 | 59 |
| **Danish Pathology Registry**61 | Detailed information about all pathological investigations of tissue and cell samples performed at hospitals and in the primary sector. Data retrieved from Danish Pathology Data Bank, which include patient information, type of investigation, sample material, diagnoses coded using a Danish version of the Systematized Nomenclature of Medicine (SNOMED) and investigating department or pathologist. | 1977- | 61,62 |
| **Danish Cancer Registry**63 | Information on all incident cancer patients in Denmark since 1943 and Greenland since 1953, incl. records of all malignant neoplasms and certain precancerous and benign lesions. Each record includes patient characteristics (e.g., residence and age of diagnosis) and tumor characteristics (e.g., diagnosis coded by International Classification of Disease 7th or 10th revision, morphology, topology, and tumor stage). | 1943- | 63–67,67–70 |
| **Danish Education Registries**71 | Information on all persons attending an education in Denmark. The education registries include several registries which share variables such as education enrolment and length. Other variables are registry specific. The Student Registry 1 holds information at grade level for primary, lower secondary, upper secondary schooling and vocational education while Student Registry 2 defines any completed level of education. The Academic Achievement Registry holds information on final grades given in primary, lower, and upper secondary schooling. The Population’s Education Registry defines the highest completed education for each person. The Adult Education and Continuing Training Registry records information on public provided adult education/training. | 1973-*** | 71 |
| **DREAM Database**72 | Information on all persons with a Danish personal identifier receiving public transfer payments such as maternity leave pay, unemployment benefit, or sickness benefit. | 1991- | 72 |
| **Danish Central Crime Registry**73–75 | Information on all convictions and imprisonments as result of offences against penal code, the road traffic act, and other special laws. | 1978- | - |
| *Data holder/permission authority*: Danish Clinical Quality Program - National Clinical Registries (RKKP) | | | |
| **Danish Rheumatology Database, DANBIO**76 | Information on patients with rheumatoid arthritis, ankylosing spondylitis, or psoriatic arthritis, including both patient-reported data on e.g., pain, disability, health-related quality of life and lifestyle, and healthcare professional-reported data on e.g., joint counts, computed disease activity scores, medication, and adverse effects. | 2006- | 22,76,77 |
| **Danish Dermatology Database, DERMBIO**78,79 | Information on all psoriasis patients in biological treatment at hospital dermatology departments and private dermatologists in Denmark. The database contains indicators of treatment effectiveness such as Psoriasis Area Severity Index and Dermatology Life Quality Index, and adverse drug reactions.. | 2009- | 80–85 |
| **Danish Breast Cancer Group (DBCG) Database**86 | Information on all women diagnosed with primary invasive nonmetastatic breast cancer in Denmark. The database receive data from pathological, surgical, and oncology departments. Available variables include patient characteristics (e.g., menopausal status), tumor characteristics, surgery, radiotherapy, systemic therapy, and follow-up (e.g., recurrence and mortality). | 1977- | 67,86 |
| **Danish Colorectal Cancer Group Database**87 | Information on all patients diagnosed with primary colorectal cancer (primary adenocarcinoma, mucinous adenocarcinoma, signet ring cell carcinoma, medullary carcinoma, or undifferentiated carcinoma) and/or treated at a surgical department in Denmark. Data on various clinical, pathological, radiological and surgical variables as well as follow-up on mortality. | 2001- | 87 |
| **Danish Pancreatic Cancer Database**88 | Information on all patients diagnosed (microscopically verified) with pancreatic ductal adenocarcinoma in Denmark. Data on variables related to the diagnostic procedure (e.g., tissue specimen for diagnosis, tumor localization, imaging techniques, tumor stage) and to the treatment (e.g., operation type, adjuvant therapy, palliative chemo- or chemoradiation therapy). Follow-up on recurrence and mortality. | 2011- | 88 |
| **Danish National Acute Leukemia Registry**89 | Information on all adults diagnosed with acute myeloid leukemia (since 2000), acute lymphoblastic leukemia (since 2005), or myelodysplastic syndrome (since 2010) in Denmark. Data on variables related to patient, disease and treatment characteristics and outcomes. | 2000- | 89,90 |
| **Danish National Lymphoma Registry**91 | Information on all patients diagnosed with malignant lymphoma and referred to hematologic departments in Denmark.  Data on variables related to diagnostic procedure, treatment, disease relapse, and follow-up (e.g., disease remission or mortality). | 2000- | 92 |
| **Danish Registry of Childhood Cancer**93 | Information on all patients diagnosed with a neoplasm at age <15 years and living in Denmark. Include cancer-related data such as type of cancer and therapy, and information on all tunneled central venous catheters and bloodstream infections registered in children at age <15 years. | 1995- | 93 |
| **Danish Heart Registry**94 | Information on all adult (>15 years) patients undergoing coronary angiography, percutaneous coronary intervention, coronary artery bypass grafting, and heart valve repair or replacement in Denmark. | 2000- | 94 |
| **Danish Vascular Registry** | Information on all reconstructive arterial and advanced vein procedures (incl. carotid endarterectomies, open repair for aortic aneurysm, endovascular aortic repairs, open peripheral arterial reconstructions, endovascular arterial interventions for atherosclerosis, and arteriovenous fistulas for renal insufficiency) performed at vascular surgical departments in Denmark. | 1989- | 95 |
| **Danish Cardiac Arrest Registry**96 | Information on cases of out-of-hospital cardiac arrest in Denmark. | 2001- | 97 |
| **Danish Pacemaker and ICD Registry**98 | Information on all pacemaker and implantable cardioverter defibrillator (ICD) implantations in Denmark. Purpose to monitor and improve the quality of treatment of patients with arrhythmias as well as implant surveillance. | 1982- | - |
| **Danish Hip Arthroplasty Registry**99 | Information on all primary and revision total hip arthroplasty surgeries performed at Danish orthopedic departments (public and private). Data on pre- and perioperative variables. | 1995- | 99–101 |
| **Danish Knee Arthroplasty Registry**102 | Information on all primary and revision knee arthroplasty surgeries performed at Danish orthopedic departments (public and private). Data on pre- and perioperative variables. | 1997- | 102 |
| **Danish Multiple Sclerosis Treatment Registry**103 | Information on all Danish inhabitants with a multiple sclerosis diagnosis who receive disease-modifying treatment. Information such as year of onset and diagnosis, side effects of treatment, radiological and laboratory results, as well as other indicators of treatment quality. | 1996- | 103,104 |
| **Danish Intensive Care Database**105 | Information on all Danish citizens being admitted to an intensive care unit (ICU). Selected variables include patient characteristics (e.g., computed Charlson comorbidity index score), ICU admission information (e.g., date and time of admission, type, organ supportive treatment), ICU discharge, and ICU mortality. | 2005- | 105 |
| **Danish Transfusion Database**106,107 | Information on all blood transfusions undertaken in Denmark. | 2007- | - |
| *Data holder/permission authority*: Depend on registry | | | |
| **Danish Twin Registry**108,109 | Information on twins born since 1870 including results on a wide range of surveys related to specific diseases, health, psychological, lifestyle and other factors, biological samples, and zygosity.  *Data holder/permission authority*: Danish Twin Research Centre, Department of Public Health, University of Southern Denmark. | 1870- | 110 |
| **Danish National Birth Cohort Database**111,112 | Information on a large research cohort of pregnant women with long-term follow-up of their offspring. Data based on wide range of telephone interviews and biological samples.  *Data holder/permission authority*: Danish National Birth Cohort, Department of Epidemiology Research, Statens Serum Institute, Denmark. | 1999- | 113 |
| **Danish Microbiology Database**114 | Microbiology information from departments of clinical microbiology incl. data on patient, requestor, test material, sampling location (anatomically), analysis information (type, result, and interpretation), and potential complex/culture identified.  *Data holder/permission authority*: Department of Infectious Disease Epidemiology, Statens Serum Institute, Denmark. | 2008- | 114 |
| **Danish Multiple Sclerosis Registry**104 | Information on all Danish inhabitants who have received a multiple sclerosis (MS) diagnosis or are suspected MS by a neurologist/Department of neurology. Information such as date of first registration, diagnostic criteria and results of cerebrospinal fluid-examination and MRI.  *Data holder/permission authority*: The Danish Multiple Sclerosis Registry, Department of Neurology, Rigshospitalet, Copenhagen University Hospital, Denmark. | 1948- | 104 |
| **Western Denmark Heart Registry**115 | Information on all patients referred to cardiac procedures or interventions such as coronary angiography, cardiac computed tomography, percutaneous coronary intervention, transcatheter aortic valve replacement, valve surgery and coronary artery bypass grafting at cardiac centers in Western Denmark (~55% of the Danish population). Regional data source of the Danish Heart Registry  *Data holder/permission authority*: The Western Denmark Heart Registry (Organization) | (1999-)** | 116 |
| **Danish Familial Relational Database**117 | Research database combining information on Danish citizens’ mother, father, siblings and permanent residence from Central Person Registry, patient information from National Patient Registry, birth information from Medical Birth Registry and information of date and cause of death from Causes of Death Registry.  *Data holder/permission authority*: The National Centre for Register-based Research, Department of Economics and Business Economics, Aarhus University, Denmark (data processor)/Danish Health Data Authority (data manager). | 1968- | - |
| **Danish National Cerebral Palsy Registry**118–120 | Information on all children with cerebral palsy diagnosed by a neuro-pediatrician or obstetrician including data on pre- and postnatal period, impairments, and demography.  *Data holder/permission authority*: National Institute of Public Health, University of Southern Denmark. | 1996- | 118,121 |
| **Danish Cytogenetic Central Registry**122 | Information on all diagnostic chromosomal analyses performed pre- and postnatal.  *Data holder/permission authority*: Clinical Genetics Department, Aarhus University Hospital, Denmark. | 1960- | - |
| **Danish Pathology Data Bank**61,123 | Information all pathological investigation performed at the pathological departments as part of the daily diagnostic processes, e.g., patient data, type of investigation, and diagnosis coded using a Danish version of the Systematized Nomenclature of Medicine (SNOMED). Data from the Danish Pathology Data Bank form the basis of the Danish Pathology Registry. The data is considered medical record data and require additional data approval.  *Data holder/permission authority*: (Steering committee of the) Danish Pathology Data Bank. | 1977- | 62 |
| **Copenhagen Mammography Registry**124,125 | Information on all mammographs (date of screening, mammographic density, and outcome of screening) performed as part of the mammography screening program in the municipality of Copenhagen.  *Data holder/permission authority*: Unclear | (1991-2001)** | - |
| **Danish Poison Information Centre (DPIC) Database**126 | Information on all telephone inquiries received by the Danish Poison Information Centre from the public and healthcare professionals. Include detailed information about the poisoning (agent, amount, mode of exposure, etc.) and the patient (demographic and clinical) as well as assessment and management of the risk.  *Data permission authority*: Danish Poison Information Centre, Copenhagen University Hospital, Denmark. | 2007- | - |
| **National Academic Test**127 | Include results of the Danish national tests which are a mandatory for all students in public primary and lower secondary school. The tests are performed within the subjects of Danish, Math, English, Geography, Physics/Chemistry, and Biology.  *Data holder/permission authority*: Danish Agency for Information Technology and Learning. | 2010- | 128–130 |

**Notes**: †Nationwide. *References related to quality of outcomes and/or data source were recorded as part of “Reporting of outcome quality”. Besides those references reported in the last column of the table, references were reported in relation to the following outcomes: European League Against Rheumatism (EULAR) treatment response score,131 Disease Activity Score in 28 joints (DAS28),132–134 Strength and Difficulties Questionnaire (SDQ),135–138 and Cognitive functioning score (5-component battery test).139–141 **The registry has regional or municipal coverage. ***Electronic registration.

**References for Table S1**:

1. Schmidt M, Pedersen L, Sørensen HT. The Danish Civil Registration System as a tool in epidemiology. *European Journal of Epidemiology*. 2014;29(8):541-549. doi:http://dx.doi.org.ep.fjernadgang.kb.dk/10.1007/s10654-014-9930-3

2. Pedersen CB. The Danish Civil Registration System. *Scand J Public Health*. 2011;39(7_suppl):22-25. doi:10.1177/1403494810387965

3. Pedersen CB, Gøtzsche H, Møller JO, Mortensen PB. The Danish Civil Registration System. A cohort of eight million persons. *Danish medical bulletin*. 2006;53(4):441-449.

4. Helweg-Larsen K. The Danish Register of Causes of Death. *Scand J Public Health*. 2011;39(7_suppl):26-29. doi:10.1177/1403494811399958

5. Juel K, Helweg-Larsen K. The Danish registers of causes of death. *Danish medical bulletin*. 1999;46(4):354-357.

6. Gjersøe P, Andersen SE, Mølbak AG, Wulff HR, Thomsen OO. Reliability of death certificates. The reproducibility of the recorded causes of death in patients admitted to departments of internal medicine. *Ugeskrift for læger*. 1998;160(35):5030-5034.

7. Madsen M, Davidsen M, Rasmussen S, Abildstrom SZ, Osler M. The validity of the diagnosis of acute myocardial infarction in routine statistics: a comparison of mortality and hospital discharge data with the Danish MONICA registry. *Journal of clinical epidemiology*. 2003;56(2):124-130.

8. Larsen SB, Brasso K, Christensen J, et al. Socioeconomic position and mortality among patients with prostate cancer: influence of mediating factors. *Acta Oncologica*. 2017;56(4):563-568. doi:10.1080/0284186X.2016.1260771

9. Schmidt M, Schmidt SAJ, Sandegaard JL, Ehrenstein V, Pedersen L, Sørensen HT. The Danish National Patient Registry: a review of content, data quality, and research potential. *Clin Epidemiol*. 2015;7:449-490. doi:10.2147/CLEP.S91125

10. Sundbøll J, Adelborg K, Munch T, et al. Positive predictive value of cardiovascular diagnoses in the Danish National Patient Registry: a validation study. *BMJ Open*. 2016;6(11). doi:http://dx.doi.org.ep.fjernadgang.kb.dk/10.1136/bmjopen-2016-012832

11. Andersen TF, Madsen M, Jørgensen J, Mellemkjoer L, Olsen JH. The Danish National Hospital Register. A valuable source of data for modern health sciences. *Danish medical bulletin*. 1999;46(3):263-268.

12. Lynge E, Sandegaard JL, Rebolj M. The Danish National Patient Register. *Scand J Public Health*. 2011;39(7_suppl):30-33. doi:10.1177/1403494811401482

13. Frost L, Andersen LV, Vestergaard P, Husted S, Mortensen LS. Trend in Mortality after Stroke with Atrial Fibrillation. *The American Journal of Medicine*. 2007;120(1):47-53. doi:10.1016/j.amjmed.2005.12.027

14. Kümler T, Gislason GH, Kirk V, et al. Accuracy of a heart failure diagnosis in administrative registers. *European Journal of Heart Failure*. 2008;10(7):658-660. doi:10.1016/j.ejheart.2008.05.006

15. Thygesen SK, Christiansen CF, Christensen S, Lash TL, Sørensen HT. The predictive value of ICD-10 diagnostic coding used to assess Charlson comorbidity index conditions in the population-based Danish National Registry of Patients. *BMC Medical Research Methodology*. 2011;11(1):83. doi:10.1186/1471-2288-11-83

16. Wildenschild C, Mehnert F, Thomsen RW, et al. Registration of acute stroke: validity in the Danish Stroke Registry and the Danish National Registry of Patients. *CLEP*. 2013;6:27-36. doi:10.2147/CLEP.S50449

17. Christensen J, Vestergaard M, Olsen J, Sidenius P. Validation of epilepsy diagnoses in the Danish National Hospital Register. *Epilepsy Research*. 2007;75(2):162-170. doi:10.1016/j.eplepsyres.2007.05.009

18. Lange J, Pedersen AB, Troelsen A, Søballe K. Do Hip Prosthesis Related Infection Codes in Administrative Discharge Registers Correctly Classify Periprosthetic Hip Joint Infection? *HIP International*. 2015;25(6):568-573. doi:10.5301/hipint.5000262

19. Adelborg K, Sundbøll J, Munch T, et al. Positive predictive value of cardiac examination, procedure and surgery codes in the Danish National Patient Registry: a population-based validation study. *BMJ Open*. 2016;6(12). doi:http://dx.doi.org.ep.fjernadgang.kb.dk/10.1136/bmjopen-2016-012817

20. Sander SD, Størdal K, Hansen TP, et al. Validation of celiac disease diagnoses recorded in the Danish National Patient Register using duodenal biopsies, celiac disease-specific antibodies, and human leukocyte-antigen genotypes. *CLEP*. 2016;8:789-799. doi:10.2147/CLEP.S122300

21. Rix TA, Riahi S, Overvad K, Lundbye-Christensen S, Schmidt EB, Joensen AM. Validity of the diagnoses atrial fibrillation and atrial flutter in a Danish patient registry. *Scandinavian Cardiovascular Journal*. 2012;46(3):149-153. doi:10.3109/14017431.2012.673728

22. Ibfelt EH, Sørensen J, Jensen DV, et al. Validity and completeness of rheumatoid arthritis diagnoses in the nationwide DANBIO clinical register and the Danish National Patient Registry. *CLEP*. 2017;9:627-632. doi:10.2147/CLEP.S141438

23. Morthorst BR, Soegaard B, Nordentoft M, Erlangsen A. Incidence Rates of Deliberate Self-Harm in Denmark 1994–2011: A Nationwide Register Study. *Crisis: The Journal of Crisis Intervention and Suicide Prevention*. 2016;37(4):256-264. doi:10.1027/0227-5910/a000391

24. Kleif J, Thygesen LC, Gögenur I. Validity of the diagnosis of appendicitis in the Danish National Patient Register. *Scand J Public Health*. 2020;48(1):38-42. doi:10.1177/1403494818761765

25. Søgaard M, Kornum JB, Schønheyder HC, Thomsen RW. Positive predictive value of the ICD-10 hospital diagnosis of pleural empyema in the Danish National Registry of Patients. *CLEP*. 2011;3(1):85-89. doi:10.2147/CLEP.S16931

26. Fonager K, Sørensen HT, Rasmussen SN, Møller-petersen J, Vyberg M. Assessment of the Diagnoses of Crohn’s Disease and Ulcerative Colitis in a Danish Hospital Information System. *Scandinavian journal of gastroenterology*. 1996;31(2):154-159.

27. Kristensen J. Validation of the danish birth registration. *Journal of Clinical Epidemiology*. 1996;49(8):893-897. doi:10.1016/0895-4356(96)00018-2

28. Thomsen RW, Lange P, Hellquist B, et al. Validity and underrecording of diagnosis of COPD in the Danish National Patient Registry. *Respiratory Medicine*. 2011;105(7):1063-1068. doi:10.1016/j.rmed.2011.01.012

29. Nordentoft M, Søgaard M. Registration, psychiatric evaluation and adherence to psychiatric treatment after suicide attempt. *Nordic Journal of Psychiatry*. 2005;59(3):213-216. doi:10.1080/08039480510027706

30. Hundrup YA, Høidrup S, Obel EB, Rasmussen NKr. The validity of self-reported fractures among Danish female nurses: comparison with fractures registered in the Danish National Hospital Register. *Scandinavian Journal of Public Health*. 2004;32(2):136-143. doi:10.1080/14034940310017490

31. Phung TKT, Andersen BB, Høgh P, Kessing LV, Mortensen PB, Waldemar G. Validity of dementia diagnoses in the Danish hospital registers. *Dementia and geriatric cognitive disorders*. 2007;24(3):220-228.

32. Agergaard P, Hebert A, Bjerre J, Sørensen KM, Olesen C, Østergaard JR. Children diagnosed with congenital cardiac malformations at the national university departments of pediatric cardiology: positive predictive values of data in the Danish National Patient Registry. *CLEP*. 2011;3(1):61-66. doi:10.2147/CLEP.S15627

33. Mosbech J, Jørgensen J, Madsen M, Rostgaard K, Thornberg K, Poulsen TD. The national patient registry. Evaluation of data quality. *Ugeskrift for læger*. 1995;157(26):3741-3745.

34. Vestergaard P, Olsen ML, Johnsen SP, Rejnmark L, Sørensen HT, Mosekilde L. Corticosteroid use and risk of hip fracture: a population-based case–control study in Denmark. *Journal of Internal Medicine*. 2003;254(5):486-493. doi:https://doi.org/10.1046/j.1365-2796.2003.01219.x

35. Lassen A, Hallas J, De Muckadell OB. Complicated and Uncomplicated Peptic Ulcers in a Danish County 1993-2002: A Population-Based Cohort Study. *The American Journal of Gastroenterology*. 2006;101(5):945-953. doi:http://dx.doi.org.ep.fjernadgang.kb.dk/10.1111/j.1572-0241.2006.00518.x

36. Schmidt M, Cannegieter SC, Johannesdottir SA, Dekkers OM, Horváth‐Puhó E, Sørensen HT. Statin use and venous thromboembolism recurrence: a combined nationwide cohort and nested case–control study. *Journal of Thrombosis and Haemostasis*. 2014;12(8):1207-1215. doi:https://doi.org/10.1111/jth.12604

37. Andersen YMF, Egeberg A, Skov L, Thyssen JP. Demographics, healthcare utilization and drug use in children and adults with atopic dermatitis in Denmark: a population-based cross-sectional study. *Journal of the European Academy of Dermatology and Venereology*. 2019;33(6):1133-1142. doi:https://doi.org/10.1111/jdv.15424

38. Bruun C, Siersma V, Guassora AD, Holstein P, Olivarius N de F. Amputations and foot ulcers in patients newly diagnosed with Type 2 diabetes mellitus and observed for 19 years. The role of age, gender and co-morbidity. *Diabetic Medicine*. 2013;30(8):964-972. doi:https://doi.org/10.1111/dme.12196

39. Floyd A, Pederson L, Nielsen GL, Thorlacius-Ussing O, Sorensen HT. Secular Trends in Incidence and 30-Day Case Fatality of Acute Pancreatitis in North Jutland County, Denmark: A Register-based Study from 1981-2000. *Scandinavian Journal of Gastroenterology*. 2002;37(12):1461-1465. doi:10.1080/003655202762671369

40. Salem LC, Andersen BB, Nielsen TR, et al. Overdiagnosis of dementia in young patients - a nationwide register-based study. *Dementia and geriatric cognitive disorders*. 2012;34(5-6):292-299. doi:http://dx.doi.org.ep.fjernadgang.kb.dk/10.1159/000345485

41. Larsen H, Nielsen GL, Bendsen J, Flint C, Olsen J, Sørensen HT. Predictive value and completeness of the registration of congenital abnormalities in three Danish population-based registries. *Scandinavian Journal of Public Health*. 2003;31(1):12-16. doi:10.1080/14034940210134194

42. Wallach Kildemoes H, Toft Sørensen H, Hallas J. The Danish National Prescription Registry. *Scand J Public Health*. 2011;39(7_suppl):38-41. doi:10.1177/1403494810394717

43. Kildemoes HW, Sørensen HT, Hallas J. The Danish National Prescription Registry. *Scand J Public Health*. 2011;39(7_suppl):38-41. doi:10.1177/1403494810394717

44. Johannesdottir SA, Horváth-Puhó E, Ehrenstein V, Schmidt M, Pedersen L, Sørensen HT. Existing data sources for clinical epidemiology: The Danish National Database of Reimbursed Prescriptions. *CLEP*. 2012;4(1):303-313. doi:10.2147/CLEP.S37587

45. Furu K, Wettermark B, Andersen M, Martikainen JE, Almarsdottir AB, Sørensen HT. The Nordic Countries as a Cohort for Pharmacoepidemiological Research. *Basic & Clinical Pharmacology & Toxicology*. 2010;106(2):86-94. doi:10.1111/j.1742-7843.2009.00494.x

46. Pottegård A, Schmidt SAJ, Wallach-Kildemoes H, Sørensen HT, Hallas J, Schmidt M. Data Resource Profile: The Danish National Prescription Registry. *International Journal of Epidemiology*. 2017;46(3):798-798f. doi:10.1093/ije/dyw213

47. Schmidt M, Hallas J, Laursen M, Friis S. Data Resource Profile: Danish online drug use statistics (MEDSTAT). *International Journal of Epidemiology*. 2016;45(5):1401-1402g. doi:10.1093/ije/dyw116

48. Gaist D, Sørensen HT, Hallas J. The Danish prescription registries. *Danish medical bulletin*. 1997;44(4):445-.

49. Toft Sørensen H, Hansen I, Ejlersen E, Sabroe S, Hamburger H. Identification of patients treated with strong analgesics: An assessment of two Danish information systems with respect to epidemiological research. *J Med Syst*. 1996;20(1):57-65. doi:10.1007/BF02260874

50. Sahl Andersen J, De Fine Olivarius N, Krasnik A. The Danish National Health Service Register. *Scand J Public Health*. 2011;39(7_suppl):34-37. doi:10.1177/1403494810394718

51. Mors O, Perto GP, Mortensen PB. The Danish Psychiatric Central Research Register. *Scand J Public Health*. 2011;39(7_suppl):54-57. doi:10.1177/1403494810395825

52. Mohr-Jensen C, Vinkel Koch S, Briciet Lauritsen M, Steinhausen HC. The validity and reliability of the diagnosis of hyperkinetic disorders in the Danish Psychiatric Central Research Registry. *European Psychiatry*. 2016;35:16-24. doi:10.1016/j.eurpsy.2016.01.2427

53. Linnet KM, Wisborg K, Secher NJ, et al. Coffee consumption during pregnancy and the risk of hyperkinetic disorder and ADHD: a prospective cohort study. *Acta Paediatrica*. 2009;98(1):173-179. doi:https://doi.org/10.1111/j.1651-2227.2008.00980.x

54. Uggerby P, Østergaard SD, Røge R, Correll CU, Nielsen J. The validity of the schizophrenia diagnosis in the Danish Psychiatric Central Research Register is good. *Danish medical journal*. 2013;60(2):A4578-A4578.

55. Madsen KM, Hviid A, Vestergaard M, et al. A Population-Based Study of Measles, Mumps, and Rubella Vaccination and Autism. *New England Journal of Medicine*. 2002;347(19):1477-1482. doi:10.1056/NEJMoa021134

56. Munk-Jørgensen P, Mortensen PB. The Danish Psychiatric Central Register. *Danish medical bulletin*. 1997;44(1):82-84.

57. Bliddal M, Link to external site this link will open in a new window, Broe A, et al. The Danish Medical Birth Register. *European journal of epidemiology*. 2018;33(1):27-36. doi:http://dx.doi.org.ep.fjernadgang.kb.dk/10.1007/s10654-018-0356-1

58. Knudsen LB, Olsen J. The Danish Medical Birth Registry. *Danish medical bulletin*. 1998;45(3):320-323.

59. Tølbøll Blenstrup L, Knudsen LB. Danish registers on aspects of reproduction. *Scand J Public Health*. 2011;39(7_suppl):79-82. doi:10.1177/1403494811399957

60. Andersen AN, Westergaard HB, Olsen J. The Danish in vitro fertilisation (IVF) register. *Danish medical bulletin*. 1999;46(4):357-360.

61. Bjerregaard B, Larsen OB. The Danish Pathology Register. *Scand J Public Health*. 2011;39(7_suppl):72-74. doi:10.1177/1403494810393563

62. Erichsen R, Lash TL, Hamilton-Dutoit SJ, Bjerregaard B, Vyberg M, Pedersen L. Existing data sources for clinical epidemiology: the Danish National Pathology Registry and Data Bank. *Clinical Epidemiology*. 2010;2:51-56. doi:http://dx.doi.org.ep.fjernadgang.kb.dk/10.2147/CLEP.S9908

63. Gjerstorff ML. The Danish Cancer Registry. *Scand J Public Health*. 2011;39(7_suppl):42-45. doi:10.1177/1403494810393562

64. Storm HH, Michelsen EV, Clemmensen IH, Pihl J. The Danish Cancer Registry–history, content, quality and use. *Danish medical bulletin*. 1997;44(5):535-539.

65. Storm HH. Completeness of cancer registration in Denmark 1943-1966 and efficacy of record linkage procedures. *International journal of epidemiology*. 1988;17(1):44-49.

66. Thorsteinsson R, Sørensen M, Jensen TL, et al. Central nervous system tumours in children. An evaluation of the completeness and validity of the Cancer Registry. *Ugeskrift for læger*. 2005;167(40):3782-3785.

67. Jensen AR, Overgaard J, Storm HH. Validity of breast cancer in the Danish Cancer Registry. A study based on clinical records from one county in Denmark. *European Journal of Cancer Prevention*. 2002;11:359-364.

68. Rostgaard K, Holst H, Mouridsen HT, Lynge E. Do Clinical Databases Render Population-Based Cancer Registers Obsolete? The Example of Breast Cancer in Denmark. *Cancer Causes & Control*. 2000;11(7):669-674.

69. Pukkala E, Engholm G, Schmidt LKH, et al. Nordic Cancer Registries -- an overview of their procedures and data comparability. *Acta Oncologica*. 2018;57(4):440-455. doi:10.1080/0284186X.2017.1407039

70. Jensen AØ, Olesen AB, Dethlefsen C, Sørensen HT. Do incident and new subsequent cases of non-melanoma skin cancer registered in a Danish prospective cohort study have different 10-year mortality? *Cancer Detection and Prevention*. 2007;31(5):352-358. doi:10.1016/j.cdp.2007.04.011

71. Jensen VM, Rasmussen AW. Danish education registers. *Scand J Public Health*. 2011;39(7_suppl):91-94. doi:10.1177/1403494810394715

72. Hjollund NH, Larsen FB, Andersen JH. Register-based follow-up of social benefits and other transfer payments: Accuracy and degree of completeness in a Danish interdepartmental administrative database compared with a population-based survey. *Scandinavian Journal of Public Health*. 2007;35(5):497-502. doi:10.1080/14034940701271882

73. Annette Rand Madsen, The National Centre for Register-based Research. The Danish Central Crime Register. Department of Economics and Business Economics, Aarhus University. Published January 14, 2021. Accessed January 27, 2022. https://econ.au.dk/the-national-centre-for-register-based-research/danish-registers/the-danish-central-crime-register

74. Statistics Denmark. Documentation of statistics: Convictions. Accessed January 27, 2022. https://www.dst.dk/en/Statistik/dokumentation/documentationofstatistics/convictions

75. Statistics Denmark. Documentation of statistics: Imprisonments. Accessed January 27, 2022. https://www.dst.dk/en/Statistik/dokumentation/documentationofstatistics/imprisonments

76. Hetland ML. DANBIO--powerful research database and electronic patient record. *Rheumatology*. 2011;50(1):69-77. doi:10.1093/rheumatology/keq309

77. Ibfelt EH, Jensen DV, Hetland ML. The Danish nationwide clinical register for patients with rheumatoid arthritis: DANBIO. *CLEP*. 2016;8:737-742. doi:10.2147/CLEP.S99490

78. Trine Bertelsen, Lone Skov, Niels Steen Krogh, Mads Rasmussen. Dansk Psoriasis database for biologisk behandling (Dermbio) –Resumé af årsrapport 2020. Ugeskriftet.dk. Published October 18, 2021. Accessed January 27, 2022. https://ugeskriftet.dk/nyhed/dansk-psoriasis-database-biologisk-behandling-dermbio-resume-af-arsrapport-2020

79. Danske Regioner. Dermbio - Biologisk behandling i dansk dermatologi - sundhed.dk. Sundhed.dk. Published November 27, 2017. Accessed January 27, 2022. https://www.sundhed.dk/sundhedsfaglig/kvalitet/kliniske-kvalitetsdatabaser/kroniske-sygdomme/dermbio---biologisk-behandling-i-dansk-dermatologi/

80. Gniadecki R, Kragballe K, Dam TN, Skov L. Comparison of drug survival rates for adalimumab, etanercept and infliximab in patients with psoriasis vulgaris. *British Journal of Dermatology*. 2011;164(5):1091-1096. doi:https://doi.org/10.1111/j.1365-2133.2011.10213.x

81. Gniadecki R, Bang B, Bryld LE, Iversen L, Lasthein S, Skov L. Comparison of long-term drug survival and safety of biologic agents in patients with psoriasis vulgaris. *British Journal of Dermatology*. 2015;172(1):244-252. doi:https://doi.org/10.1111/bjd.13343

82. Ahlehoff O, Skov L, Gislason G, et al. Cardiovascular outcomes and systemic anti-inflammatory drugs in patients with severe psoriasis: 5-year follow-up of a Danish nationwide cohort. *Journal of the European Academy of Dermatology and Venereology*. 2015;29(6):1128-1134. doi:https://doi.org/10.1111/jdv.12768

83. Ahlehoff O, Skov L, Gislason G, et al. Pharmacological Undertreatment of Coronary Risk Factors in Patients with Psoriasis: Observational Study of the Danish Nationwide Registries. Zuffi A, ed. *PLoS ONE*. 2012;7(4):e36342. doi:10.1371/journal.pone.0036342

84. Egeberg A, Iversen L, Gniadecki R, et al. Characteristics of patients receiving ustekinumab compared with secukinumab for treatment of moderate-to-severe plaque psoriasis – nationwide results from the DERMBIO registry. *Journal of the European Academy of Dermatology and Venereology*. 2017;31(7):1183-1187. doi:https://doi.org/10.1111/jdv.14200

85. Egeberg A, Nast A. A critical eye on registry data in psoriasis. *British Journal of Dermatology*. 2017;177(1):245-246. doi:https://doi.org/10.1111/bjd.15309

86. Christiansen P, Ejlertsen B, Jensen MB, Mouridsen H. Danish Breast Cancer Cooperative Group. *CLEP*. 2016;8:445-449. doi:10.2147/CLEP.S99457

87. Ingeholm P, Gögenur I, Iversen LH. Danish Colorectal Cancer Group Database. *CLEP*. 2016;8:465-468. doi:10.2147/CLEP.S99481

88. Fristrup C, Detlefsen S, Hansen CP, Ladekarl M. Danish Pancreatic Cancer Database. *CLEP*. 2016;8:645-648. doi:10.2147/CLEP.S99471

89. Østgård LSG, Nørgaard JM, Raaschou-Jensen KK, et al. The Danish National Acute Leukemia Registry. *CLEP*. 2016;8:553-560. doi:10.2147/CLEP.S99460

90. Østgård LSG, Nørgaard JM, Severinsen MT, et al. Data quality in the Danish National Acute Leukemia Registry: a hematological data resource. *CLEP*. 2013;5(1):335-344. doi:10.2147/CLEP.S48411

91. Arboe B, Josefsson P, Jørgensen J, et al. Danish National Lymphoma Registry. *Clin Epidemiol*. 2016;8:577-581. doi:10.2147/CLEP.S99470

92. Arboe B, El-Galaly TC, Clausen MR, et al. The Danish National Lymphoma Registry: Coverage and Data Quality. *PLOS ONE*. 2016;11(6):e0157999. doi:10.1371/journal.pone.0157999

93. Schrøder H, Rechnitzer C, Wehner PS, et al. Danish Childhood Cancer Registry. *CLEP*. 2016;8:461-464. doi:10.2147/CLEP.S99508

94. Abildstrøm SZ, Madsen M. The Danish Heart Register. *Scand J Public Health*. 2011;39(7_suppl):46-49. doi:10.1177/1403494810393561

95. Laustsen J, Jensen LP, Hansen AK, The Danish National Vascular Registry. Accuracy of Clinical Data in a Population Based Vascular Registry. *European Journal of Vascular and Endovascular Surgery*. 2004;27(2):216-219. doi:10.1016/j.ejvs.2003.11.011

96. Danish Cardiac Arrest Registry. In English – Dansk Hjertestopregister. Accessed January 27, 2022. https://hjertestopregister.dk/?page_id=428

97. Wissenberg M, Lippert FK, Folke F, et al. Association of National Initiatives to Improve Cardiac Arrest Management With Rates of Bystander Intervention and Patient Survival After Out-of-Hospital Cardiac Arrest. *JAMA*. 2013;310(13):1377. doi:10.1001/jama.2013.278483

98. Danske Regioner. Danish Pacemaker and ICD Registry (in Danish: Danske Pacemaker og ICD-register). Sundhed.dk. Published December 22, 2020. Accessed January 27, 2022. https://www.sundhed.dk/sundhedsfaglig/kvalitet/kliniske-kvalitetsdatabaser/hjerte-kar-sygdomme/pacemaker-icd/

99. Gundtoft PH, Varnum C, Pedersen AB, Overgaard S. The Danish Hip Arthroplasty Register. *CLEP*. 2016;8:509-514. doi:10.2147/CLEP.S99498

100. Gundtoft PH, Pedersen AB, Schønheyder HC, Overgaard S. Validation of the diagnosis ‘prosthetic joint infection’ in the Danish Hip Arthroplasty Register. *The Bone & Joint Journal*. 2016;98-B(3):320-325. doi:10.1302/0301-620X.98B3.36705

101. Gundtoft PH, Overgaard S, Schønheyder HC, Møller JK, Kjærsgaard-Andersen P, Pedersen AB. The “true” incidence of surgically treated deep prosthetic joint infection after 32,896 primary total hip arthroplasties. *Acta Orthopaedica*. 2015;86(3):326-334. doi:10.3109/17453674.2015.1011983

102. Pedersen AB, Mehnert F, Odgaard A, Schrøder HM. Existing data sources for clinical epidemiology: The Danish Knee Arthroplasty Register. *CLEP*. 2012;4(1):125-135. doi:10.2147/CLEP.S30050

103. Magyari M, Koch-Henriksen N, Sørensen PS. The Danish Multiple Sclerosis Treatment Register. *CLEP*. 2016;8:549-552. doi:10.2147/CLEP.S99500

104. Koch‐Henriksen N, Magyari M, Laursen B. Registers of multiple sclerosis in Denmark. *Acta Neurologica Scandinavica*. 2015;132(S199):4-10. doi:https://doi.org/10.1111/ane.12424

105. Christiansen CF, Møller MH, Nielsen H, Christensen S. The Danish Intensive Care Database. *CLEP*. 2016;8:525-530. doi:10.2147/CLEP.S99476

106. Schmidt M, Schmidt SAJ, Adelborg K, et al. The Danish health care system and epidemiological research: from health care contacts to database records. *Clin Epidemiol*. 2019;11:563-591. doi:10.2147/CLEP.S179083

107. Copenhagen Healthtech Cluster. Danish Transfusion Database. Copenhagen Healthtech Cluster. Accessed January 27, 2022. https://www.danishhealthdata.com/find-health-data/,-w-,

108. Danish Twin Research Center, Department of Public Health, Univsersity of Southern Denmark. The Danish Twin Registry. SDU. Accessed January 26, 2022. https://www.sdu.dk/en/om_sdu/institutter_centre/ist_sundhedstjenesteforsk/centre/dtr/researcher/data

109. Pedersen DA, Larsen LA, Nygaard M, et al. The Danish Twin Registry: An Updated Overview. *Twin Research and Human Genetics*. 2019;22(6):499-507. doi:10.1017/thg.2019.72

110. Skytthe A, Kyvik K, Bathum L, Holm N, Vaupel JW, Christensen K. The Danish Twin Registry in the New Millennium. *Twin Research and Human Genetics*. 2006;9(6):763-771. doi:10.1375/twin.9.6.763

111. Danish National Birth Cohort. About the DNBC. Danish National Birth Cohort webpage. Published October 20, 2020. Accessed January 26, 2022. https://www.dnbc.dk/about-the-dnbc

112. Danish National Birth Cohort. Data available. Danish National Birth Cohort webpage. Accessed January 26, 2022. https://www.dnbc.dk/data-available

113. Olsen J, Melbye M, Olsen SF, et al. The Danish National Birth Cohort -- its background, structure and aim. *Scandinavian Journal of Public Health*. 2001;29(4):300-307. doi:10.1177/14034948010290040201

114. Voldstedlund M, Haarh M, Mølbak K, Representatives the MB of. The Danish Microbiology Database (MiBa) 2010 to 2013. *Eurosurveillance*. 2014;19(1):20667. doi:10.2807/1560-7917.ES2014.19.1.20667

115. Schmidt M, Maeng M, Madsen M, Sørensen HT, Jensen LO, Jakobsen CJ. The Western Denmark Heart Registry: Its Influence on Cardiovascular Patient Care. *Journal of the American College of Cardiology*. 2018;71(11):1259-1272. doi:10.1016/j.jacc.2017.10.110

116. Rasmussen LA, Bøtker HE, Jensen LO, et al. Quality assurance of the Western Denmark Heart Registry, a population-based healthcare register. *Danish medical journal*. 2017;64(10).

117. Pedersen CB. The Family Relation Database. Published online October 30, 2013. Accessed January 26, 2022. https://econ.au.dk/fileadmin/The_Family_Relations_Database_2013_10.pdf

118. Topp M, Langhoff-Roos J, Uldall P. Validation of a cerebral palsy register. *Journal of Clinical Epidemiology*. 1997;50(9):1017-1023. doi:10.1016/S0895-4356(97)00102-9

119. Petersen TG, Liew Z, Andersen AN, et al. Use of paracetamol, ibuprofen or aspirin in pregnancy and risk of cerebral palsy in the child. *Int J Epidemiol*. 2018;47(1):121-130.

120. National Institute of Public Health. Danish National Cerebral Palsy Registry (in Danish: Det Nationale Cerebral Parese Register). SDU. Published November 19, 2019. Accessed January 26, 2022. https://www.sdu.dk/da/sif/forskning/projekter/det_nationale_cerebral_parese_register

121. Uldall P, Michelsen SI, Topp M, Madsen M. The Danish Cerebral Palsy Registry. A registry on a specific impairment. *Danish medical bulletin*. 2001;48(3):161-163.

122. Nguyen-Nielsen M, Svensson E, Vogel, Ehrenstein V, Sunde. Existing data sources for clinical epidemiology: Danish registries for studies of medical genetic diseases. *CLEP*. Published online August 2013:249. doi:10.2147/CLEP.S45228

123. Patobank. Patobank – En landsdækkende databank fra pato-anatomiske undersøgelser. Published 2019. Accessed January 26, 2022. https://www.patobank.dk/

124. Azam S, Lange T, Huynh S, et al. Hormone replacement therapy, mammographic density, and breast cancer risk: a cohort study. *Cancer Causes Control*. 2018;29(6):495-505. doi:10.1007/s10552-018-1033-0

125. Vejborg I, Olsen AH, Jensen MB, Rank F, Tange UB, Lynge E. Early outcome of mammography screening in Copenhagen 1991–99. *J Med Screen*. 2002;9(3):115-119. doi:10.1136/jms.9.3.115

126. Bøgevig S, Høgberg LCG, Dalhoff KP, Mortensen OS. Status and trends in poisonings in Denmark 2007-2009. Published online 2007:5.

127. Beuchert L, Nandrup A. The Danish National Tests at a Glance. *SSRN Journal*. Published online 2017. doi:10.2139/ssrn.2996431

128. Rasch G. *Probabilistic Models for Some Intelligence and Attainment Tests /*. Danmarks pædagogiske Institut; 1960.

129. Wandall J. National Tests in Denmark: CAT as a pedagogic tool. *Forum for promoting 3-19 comprehensive education*. 2017;59(2):145-.

130. Beuchert LV, Nandrup AB. *The Danish National Tests - A Practical Guide*. Institut for Økonomi, Aarhus Universitet; 2014.

131. Gestel AM van, Prevoo MLL, Hof MA van ’t, Rijswijk MH van, Putte LBA van de, Riel PLCM van. Development and validation of the European League Against Rheumatism response criteria for rheumatoid arthritis: comparison with the preliminary American College of Rheumatology and the World Health Organization/International League Against Rheumatism criteria. *Arthritis and rheumatism*. 1996;39:34-40.

132. Fransen J. Remission in rheumatoid arthritis: agreement of the disease activity score (DAS28) with the ARA preliminary remission criteria. *Rheumatology*. 2004;43(10):1252-1255. doi:10.1093/rheumatology/keh297

133. Prevoo MLL, Van’T Hof MA, Kuper HH, Van Leeuwen MA, Van De Putte LBA, Van Riel PLCM. Modified disease activity scores that include twenty-eight-joint counts: development and validation in a prospective longitudinal study of patients with rheumatoid arthritis. *Arthritis & Rheumatism*. 1995;38(1):44-48. doi:10.1002/art.1780380107

134. Aletaha D, Nell VP, Stamm T, et al. Acute phase reactants add little to composite disease activity indices for rheumatoid arthritis: validation of a clinical activity score. *Arthritis Research & Therapy*. 2005;7(4):R796. doi:10.1186/ar1740

135. Goodman R. The Strengths and Difficulties Questionnaire: A Research Note. *Journal of Child Psychology and Psychiatry*. 1997;38(5):581-586. doi:https://doi.org/10.1111/j.1469-7610.1997.tb01545.x

136. Goodman A, Goodman R. Strengths and Difficulties Questionnaire scores and mental health in looked after children. *The British Journal of Psychiatry*. 2012;200(5):426-427. doi:10.1192/bjp.bp.111.104380

137. Niclasen J, Teasdale TW, Andersen AMN, Skovgaard AM, Elberling H, Obel C. Psychometric Properties of the Danish Strength and Difficulties Questionnaire: The SDQ Assessed for More than 70,000 Raters in Four Different Cohorts. *PLOS ONE*. 2012;7(2):e32025. doi:10.1371/journal.pone.0032025

138. Ullebø AK, Posserud MB, Heiervang E, Gillberg C, Obel C. Screening for the attention deficit hyperactivity disorder phenotype using the strength and difficulties questionnaire. *European Child & Adolescent Psychiatry*. 2011;20(9):451-458. doi:10.1007/s00787-011-0198-9

139. Vestergaard S, Thinggaard M, Jeune B, Vaupel JW, McGue M, Christensen K. Physical and mental decline and yet rather happy? A study of Danes aged 45 and older. *Aging & Mental Health*. 2015;19(5):400-408. doi:10.1080/13607863.2014.944089

140. McGue M, Christensen K. Growing Old but Not Growing Apart: Twin Similarity in the Latter Half of the Lifespan. *Behavior Genetics*. 2013;43(1):1-12. doi:10.1007/s10519-012-9559-5

141. Dokkedal U, Hansen TG, Rasmussen LS, Mengel-From J, Christensen K. Cognitive Functioning after Surgery in Middle-aged and Elderly Danish Twins. *Anesthesiology*. 2016;124(2):312-321. doi:10.1097/ALN.0000000000000957

# **Table S2** Search strategies1 in PubMed and Scopus

| Database | Search terms | Hits | Filters: | Performed |
| --- | --- | --- | --- | --- |
| PubMed | ("registries"[MeSH Terms] OR "registries"[TIAB] OR "registry"[TIAB] OR "register"[TIAB] OR "registers"[TIAB]) AND ("danish"[TIAB] OR "denmark"[MeSH Terms] OR "denmark"[TIAB]) AND ("therapeutics"[MeSH Terms] OR "therapeutics"[TIAB] OR "drug therapy"[MeSH Subheading] OR "drug therapy"[MeSH Terms] OR "therapeutic use"[MeSH Subheading] OR "therapeutic use"[TIAB] OR "pharmaceutical preparations"[MeSH Terms] OR "medication"[TIAB] OR "medications"[TIAB] OR "drug"[TIAB] OR "Pharmacoepidemiology"[MeSH Terms] OR "Pharmacoepidemiology"[TIAB]) | 783 | Humans, English, from 2018/1/1 - 2019/12/31 | Nov. 18, 2020 |
| Scopus | TITLE-ABS-KEY (("registries" OR "registry" OR "register" OR "registers") AND ("danish" OR "denmark") AND ("therapeutics" OR "drug therapy" OR "therapeutic use" OR "pharmaceutical preparations" OR "medication" OR "medications" OR "drug" OR "Pharmacoepidemiology")) | 463 | PUBYEAR > 2017 AND PUBYEAR < 2020 AND (LIMIT-TO (LANGUAGE, "English")) | Dec. 6, 2020 |

**References for Table S2**:

Thor Petersen C, Jensen KJ, Rosenzweig M, Ankarfeldt MZ, Kampen G, Petersen J. Outcomes measures in current Danish pharmacoepidemiological research: a protocol for a systematic mapping review [version 1; peer review: awaiting peer review]. *F1000Research.* 2021;10(368). doi:10.12688/f1000research.52727.1

# **Table S3** List of the 210 included studies in the systematic mapping review

| **References:** |
| --- |
| 1. Adelborg K, Sundbøll J, Schmidt M, et al. Use of histamine H2 receptor antagonists and outcomes in patients with heart failure: a nationwide population-based cohort study. Clin Epidemiol. 2018;10:521-530. doi:10.2147/CLEP.S162909 |
| 1. Ahern TP, Broe A, Lash TL, et al. Phthalate Exposure and Breast Cancer Incidence: A Danish Nationwide Cohort Study. JCO. 2019;37(21):1800-1809. doi:10.1200/JCO.18.02202 |
| 1. Andersen JB, Moberg JY, Spelman T, Magyari M. Pregnancy Outcomes in Men and Women Treated With Teriflunomide. A Population-Based Nationwide Danish Register Study. Front Immunol. 2018;9. doi:10.3389/fimmu.2018.02706 |
| 1. Andersen SL, Knøsgaard L, Olsen J, Vestergaard P, Andersen S. Maternal Thyroid Function, Use of Antithyroid Drugs in Early Pregnancy, and Birth Defects. The Journal of Clinical Endocrinology & Metabolism. 2019;104(12):6040-6048. doi:10.1210/jc.2019-01343 |
| 1. Andersson C, Hansen PW, Steffensen IE, et al. Mortality associated with cardiovascular drugs in patients with chronic obstructive pulmonary disease and right-sided heart failure – A danish nationwide registry-based study. European Journal of Internal Medicine. 2019;63:56-61. doi:10.1016/j.ejim.2019.02.014 |
| 1. Andersson NW, Svanström H, Lund M, Pasternak B, Melbye M. Comparative effectiveness and safety of apixaban, dabigatran, and rivaroxaban in patients with non-valvular atrial fibrillation. International Journal of Cardiology. 2018;268:113-119. doi:10.1016/j.ijcard.2018.03.047 |
| 1. Axelsson PB, Clausen TD, Petersen AH, et al. Investigating the effects of cesarean delivery and antibiotic use in early childhood on risk of later attention deficit hyperactivity disorder. Journal of Child Psychology & Psychiatry. 2019;60(2):151-159. doi:10.1111/jcpp.12961 |
| 1. Azam S, Lange T, Huynh S, et al. Hormone replacement therapy, mammographic density, and breast cancer risk: a cohort study. Cancer Causes Control. 2018;29(6):495-505. doi:10.1007/s10552-018-1033-0 |
| 1. Baech J, Hansen SM, Lund PE, et al. Cumulative anthracycline exposure and risk of cardiotoxicity; a Danish nationwide cohort study of 2440 lymphoma patients treated with or without anthracyclines. British Journal of Haematology. 2018;183(5):717-726. doi:10.1111/bjh.15603 |
| 1. Ballegaard C, Højgaard P, Dreyer L, et al. Impact of Comorbidities on Tumor Necrosis Factor Inhibitor Therapy in Psoriatic Arthritis: A Population-Based Cohort Study. Arthritis Care & Research. 2018;70(4):592-599. doi:10.1002/acr.23333 |
| 1. Bang UC, Watanabe T, Bendtsen F. The relationship between the use of statins and mortality, severity, and pancreatic cancer in Danish patients with chronic pancreatitis: European Journal of Gastroenterology & Hepatology. 2018;30(3):346-351. doi:10.1097/MEG.0000000000001060 |
| 1. Banke A, Fosbøl EL, Ewertz M, et al. Long-Term Risk of Heart Failure in Breast Cancer Patients After Adjuvant Chemotherapy With or Without Trastuzumab. JACC: Heart Failure. 2019;7(3):217-224. doi:10.1016/j.jchf.2018.09.001 |
| 1. Banke A, Fosbøl EL, Møller JE, et al. Long-term effect of epirubicin on incidence of heart failure in women with breast cancer: insight from a randomized clinical trial. European Journal of Heart Failure. 2018;20(10):1447-1453. doi:10.1002/ejhf.1168 |
| 1. Barcella CA, Lamberts M, McGettigan P, et al. Differences in cardiovascular safety with non- steroidal anti-inflammatory drug therapy—A nationwide study in patients with osteoarthritis. Basic & Clinical Pharmacology & Toxicology. 2019;124(5):629-641. doi:10.1111/bcpt.13182 |
| 1. Bech LF, Polcwiartek C, Kragholm K, et al. In utero exposure to antiepileptic drugs is associated with learning disabilities among offspring. Journal of Neurology, Neurosurgery and Psychiatry. 2018;89(12):1324. doi: 10.1136/jnnp-2018-318386 |
| 1. Bens A, Friis S, Dehlendorff C, et al. Low-dose aspirin use and risk of contralateral breast cancer: a Danish nationwide cohort study. Preventive Medicine. 2018;116:186-193. doi:10.1016/j.ypmed.2018.09.015 |
| 1. Binding C, Bjerring Olesen J, Abrahamsen B, Staerk L, Gislason G, Nissen Bonde A. Osteoporotic Fractures in Patients With Atrial Fibrillation Treated With Conventional Versus Direct Anticoagulants. Journal of the American College of Cardiology. 2019;74(17):2150-2158. doi:10.1016/j.jacc.2019.08.1025 |
| 1. Boel JB, Jansåker F, Hertz FB, et al. Treatment duration of pivmecillinam in men, non-pregnant and pregnant women for community-acquired urinary tract infections caused by Escherichia coli: a retrospective Danish cohort study. Journal of Antimicrobial Chemotherapy. 2019;74(9):2767-2773. doi:10.1093/jac/dkz211 |
| 1. Bonde AN, Blanche P, Staerk L, et al. Oral anticoagulation among atrial fibrillation patients with anaemia: an observational cohort study. European Heart Journal. 2019;40(46):3782-3790. doi:10.1093/eurheartj/ehz155 |
| 1. Bonde AN, Staerk L, Lee CJ-Y, et al. Outcomes Among Patients With Atrial Fibrillation and Appropriate Anticoagulation Control. Journal of the American College of Cardiology. 2018;72(12):1357-1365. doi:10.1016/j.jacc.2018.06.065 |
| 1. Bonderup OK, Nielsen GL, Dall M, Pottegård A, Hallas J. Significant association between the use of different proton pump inhibitors and microscopic colitis: a nationwide Danish case‐ control study. Alimentary Pharmacology & Therapeutics. 2018;48(6):618-625. doi:10.1111/apt.14916 |
| 1. Broe A, Pottegård A, Hallas J, Ahern TP, Fedder J, Damkier P. Association between use of phthalate-containing medication and semen quality among men in couples referred for assisted reproduction. Hum Reprod. 2018;33(3):503-511. doi:10.1093/humrep/dey009 |
| 1. Broe A, Pottegård A, Hallas J, Ahern TP, Lamont RF, Damkier P. Phthalate exposure from drugs during pregnancy and possible risk of preterm birth and small for gestational age. European Journal of Obstetrics & Gynecology and Reproductive Biology. 2019;240:293-299. doi:10.1016/j.ejogrb.2019.07.023 |
| 1. Bruun SB, Petersen I, Kristensen NR, Cronin-Fenton D, Pedersen AB. Selective serotonin reuptake inhibitor use and mortality, postoperative complications, and quality of care in hip fracture patients: a Danish nationwide cohort study. Clin Epidemiol. 2018;10:1053-1071. doi:10.2147/CLEP.S166309 |
| 1. Buron MD, Chalmer TA, Sellebjerg F, et al. Comparative effectiveness of teriflunomide and dimethyl fumarate: A nationwide cohort study. Neurology. 2019;92(16):e1811-e1820. doi:10.1212/WNL.0000000000007314 |
| 1. Butt JH, Li A, Xian Y, et al. Direct oral anticoagulant– versus vitamin K antagonist–related gastrointestinal bleeding: Insights from a nationwide cohort. American Heart Journal. 2019;216:117-124. doi:10.1016/j.ahj.2019.07.012 |
| 1. Butt SA, Lidegaardi Ø, Skovlund C, et al. Hormonal contraceptive use and risk of pancreatic cancer—A cohort study among premenopausal women. PLoS One. 2018;13(10). doi:10.1371/journal.pone.0206358 |
| 1. Chalmer TA, Baggesen LM, Nørgaard M, Koch‐Henriksen N, Magyari M, Sorensen PS. Early versus later treatment start in multiple sclerosis: a register-based cohort study. European Journal of Neurology. 2018;25(10):1262-e110. doi:10.1111/ene.13692 |
| 1. Chalmer TA, Kalincik T, Laursen B, et al. Treatment escalation leads to fewer relapses compared with switching to another moderately effective therapy. Journal of Neurology. 2019;266(2):306-315. doi:10.1007/s00415-018-9126-y |
| 1. Chen J, Liang H, Miao M, et al. In utero beta-2-adrenergic agonists exposure and risk of epilepsy: A Danish nationwide population-based cohort study. Pharmacoepidemiology and Drug Safety. 2018;27(11):1200-1208. doi:10.1002/pds.4648 |
| 1. Christensen AP, Boegevig S, Christensen MB, Petersen KM, Dalhoff KP, Petersen TS. Overdoses with Aripiprazole: Signs, Symptoms and Outcome in 239 Exposures Reported to the Danish Poison Information Centre. Basic & Clinical Pharmacology & Toxicology. 2018;122(2):293-298. doi:10.1111/bcpt.12902 |
| 1. Christensen J, Pedersen HS, Fenger-Grøn M, Fann JR, Jones NC, Vestergaard M. Selective serotonin reuptake inhibitors and risk of epilepsy after traumatic brain injury – A population based cohort study. McDonald S, ed. PLoS ONE. 2019;14(7):e0219137. doi:10.1371/journal.pone.0219137 |
| 1. Christensen J, Pedersen L, Sun Y, Dreier JW, Brikell I, Dalsgaard S. Association of Prenatal Exposure to Valproate and Other Antiepileptic Drugs With Risk for Attention- Deficit/Hyperactivity Disorder in Offspring. JAMA Netw Open. 2019;2(1):e186606. doi:10.1001/jamanetworkopen.2018.6606 |
| 1. Christensen MB, Petersen KM, Bøgevig S, et al. Outcomes following calcium channel blocker exposures reported to a poison information center. BMC Pharmacol Toxicol. 2018;19. doi:10.1186/s40360-018-0271-9 |
| 1. Christiansen CF, Link to external site this link will open in a new window, Thomsen RW, Schmidt M, Pedersen L, Sørensen HT. Influenza vaccination and 1-year risk of myocardial infarction, stroke, heart failure, pneumonia, and mortality among intensive care unit survivors aged 65 years or older: a nationwide population-based cohort study. Intensive Care Medicine. 2019;45(7):957-967. doi:10.1007/s00134-019-05648-4 |
| 1. Christoffersen T, Andersen JT, Dalhoff KP, Horwitz H. Anabolic-androgenic steroids and the risk of imprisonment. Drug and Alcohol Dependence. 2019;203:92-97. doi:10.1016/j.drugalcdep.2019.04.041 |
| 1. Cordtz RL, Zobbe K, Højgaard P, et al. Predictors of revision, prosthetic joint infection and mortality following total hip or total knee arthroplasty in patients with rheumatoid arthritis: a nationwide cohort study using Danish healthcare registers. Annals of the Rheumatic Diseases. 2018;77(2):281. doi:10.1136/annrheumdis-2017-212339 |
| 1. D’Souza M, Smedegaard L, Madelaire C, et al. Atrial fibrillation and anticoagulation in patients with breast cancer. Scandinavian Cardiovascular Journal. 2019;53(5):247-254. doi:10.1080/14017431.2019.1638517 |
| 1. Dalgaard F, Pallisgaard JL, Lindhardt TB, Torp-Pedersen C, Gislason GH, Ruwald MH. Rate and rhythm therapy in patients with atrial fibrillation and the risk of pacing and bradyarrhythmia. Heart Rhythm. 2019;16(9):1348-1356. doi:10.1016/j.hrthm.2019.05.018 |
| 1. Dalgaard F, Pallisgaard JL, Numé A, et al. Rate or Rhythm Control in Older Atrial Fibrillation Patients: Risk of Fall‐Related Injuries and Syncope. J Am Geriatr Soc. 2019;67(10):2023-2030. doi:10.1111/jgs.16062 |
| 1. Damkier P, Brønniche LMS, Korch-Frandsen JFB, Broe A. In utero exposure to antibiotics and risk of congenital malformations: a population-based study. American Journal of Obstetrics and Gynecology. 2019;221(6):648.e1-648.e15. doi:10.1016/j.ajog.2019.06.050 |
| 1. Daugaard C, Link to external site this link will open in a new window, Pedersen AB, Kristensen NR, Johnsen SP. Preoperative antithrombotic therapy and risk of blood transfusion and mortality following hip fracture surgery: a Danish nationwide cohort study. Osteoporosis International. 2019;30(3):583-591. doi:10.1007/s00198-018-4786-0 |
| 1. de la Cour CD, Dehlendorff C, Aalborg GL, et al. Use of nonaspirin nonsteroidal anti- inflammatory drugs and risk of head and neck cancer: A nationwide case–control study. International Journal of Cancer. 2020;146(8):2139-2146. doi:10.1002/ijc.32544 |
| 1. Dreier JW, Pedersen CB, Gasse C, Christensen J. Antiepileptic Drugs and Suicide: Role of Prior Suicidal Behavior and Parental Psychiatric Disorder. Annals of Neurology. 2019;86(6):951-961. doi:10.1002/ana.25623 |
| 1. Dreyer L, Cordtz RL, Hansen IMJ, Kristensen LE, Hetland ML, Mellemkjaer L. Risk of second malignant neoplasm and mortality in patients with rheumatoid arthritis treated with biological DMARDs: a Danish population-based cohort study. Annals of the Rheumatic Diseases. 2018;77(4):510-514. doi:10.1136/annrheumdis-2017-212086 |
| 1. Dydensborg Sander S, Nybo Andersen A-M, Murray JA, Karlstad Ø, Husby S, Størdal K. Association Between Antibiotics in the First Year of Life and Celiac Disease. Gastroenterology. 2019;156(8):2217-2229. doi:10.1053/j.gastro.2019.02.039 |
| 1. Egeberg A, Ottosen MB, Gniadecki R, et al. Safety, efficacy and drug survival of biologics and biosimilars for moderate-to-severe plaque psoriasis. British Journal of Dermatology. 2018;178(2):509-519. doi:10.1111/bjd.16102 |
| 1. Ehrenstein V, Kristensen NR, Monz BU, Clinch B, Kenwright A, Sørensen HT. Oseltamivir in pregnancy and birth outcomes. BMC Infectious Diseases. 2018;18(1):519. doi:10.1186/s12879-018-3423-z |
| 1. Einfeldt MN, Olsen A-MS, Kristensen SL, et al. Long-Term Outcome in Patients With Heart Failure Treated With Levothyroxine: An Observational Nationwide Cohort Study. The Journal of Clinical Endocrinology & Metabolism. 2019;104(5):1725-1734. doi:10.1210/jc.2018-01604 |
| 1. Elkjær LS, Bech BH, Sun Y, Laursen TM, Christensen J. Association Between Prenatal Valproate Exposure and Performance on Standardized Language and Mathematics Tests in School-aged Children. JAMA Neurol. 2018;75(6):663. doi:10.1001/jamaneurol.2017.5035 |
| 1. Ennis ZN, Pottegård A, Ahern TP, Hallas J, Damkier P. Exposure to phthalate-containing prescription drugs and the risk of colorectal adenocarcinoma: a Danish nationwide case-control study. Pharmacoepidemiol Drug Saf. 2019;28(4):528-535. doi:10.1002/pds.4759 |
| 1. Faber MT, Duun-Henriksen AK, Dehlendorff C, Tatla MK, Munk C, Kjaer SK. Adverse pregnancy outcomes and infant mortality after quadrivalent HPV vaccination during pregnancy. Vaccine. 2019;37(2):265-271. doi:10.1016/j.vaccine.2018.11.030 |
| 1. Fedosova M, Kimose H-H, Greisen JR, Fast P, Gissel MS, Jakobsen C-J. Blood cardioplegia benefits only patients with a long cross-clamp time. Perfusion. 2019;34(1):42-49. doi:10.1177/0267659118790914 |
| 1. Fenger-Grøn M, Vestergaard M, Pedersen HS, et al. Depression, antidepressants, and the risk of non-valvular atrial fibrillation: A nationwide Danish matched cohort study. Eur J Prev Cardiolog. 2019;26(2):187-195. doi:10.1177/2047487318811184 |
| 1. Fransgaard T, Thygesen LC, Gögenur. Statin use is not associated with improved 30-day survival in patients undergoing surgery for colorectal cancer. International Journal of Colorectal Disease. 2018;33(2):199-207. doi:10.1007/s00384-017-2947-9 |
| 1. Frisch M, Besson A, Clemmensen KKB, Valentiner-Branth P, Mølbak K, Hviid A. Quadrivalent human papillomavirus vaccination in boys and risk of autoimmune diseases, neurological diseases and venous thromboembolism. International Journal of Epidemiology. 2018;47(2):634-641. doi:10.1093/ije/dyx273 |
| 1. Gjervig Hansen H, Köhler-Forsberg O, Petersen L, et al. Infections, Anti-infective Agents, and Risk of Deliberate Self-harm and Suicide in a Young Cohort: A Nationwide Study. Biological Psychiatry. 2019;85(9):744-751. doi:10.1016/j.biopsych.2018.11.008 |
| 1. Glassou EN, Kristensen N, Møller BK, Erikstrup C, Hansen TB, Pedersen AB. Impact of preadmission anti-inflammatory drug use on the risk of RBC transfusion in elderly hip fracture patients: a Danish nationwide cohort study, 2005–2016. Transfusion. 2019;59(3):935-944. doi:10.1111/trf.15110 |
| 1. Glintborg B, Ibsen R, Bilbo REQ, Lund Hetland M, Kjellberg J. Does a mandatory non-medical switch from originator to biosimilar etanercept lead to increase in healthcare use and costs? A Danish register-based study of patients with inflammatory arthritis. RMD Open. 2019;5(2). doi:10.1136/rmdopen-2019-001016 |
| 1. Glintborg B, Sørensen J, Hetland ML. Does a mandatory non-medical switch from originator to biosimilar infliximab lead to increased use of outpatient healthcare resources? A register-based study in patients with inflammatory arthritis. RMD Open. 2018;4(2). doi:10.1136/rmdopen- 2018-000710 |
| 1. Gregersen R, Link to external site this link will open in a new window, Andresen K, Burcharth J, Pommergaard H-C, Rosenberg J. Long-term mortality and recurrence in patients treated for colonic diverticulitis with abscess formation: a nationwide register-based cohort study. International Journal of Colorectal Disease. 2018;33(4):431-440. doi:10.1007/s00384-018-2990-1 |
| 1. Grøn KL, Glintborg B, Nørgaard M, et al. Comparative Effectiveness of Certolizumab Pegol, Abatacept, and Biosimilar Infliximab in Patients With Rheumatoid Arthritis Treated in Routine Care: Observational Data From the Danish DANBIO Registry Emulating a Randomized Trial. Arthritis & Rheumatology. 2019;71(12):1997-2004. doi:https://doi.org/10.1002/art.41031 |
| 1. Grøn KL, Arkema EV, Link to external site this link will open in a new window, et al. Risk of serious infections in patients with rheumatoid arthritis treated in routine care with abatacept, rituximab and tocilizumab in Denmark and Sweden. Annals of the Rheumatic Diseases. 2019;78(3):320. doi:10.1136/annrheumdis-2018-214326 |
| 1. Grove EL, Skjøth F, Nielsen PB, Christensen TD, Larsen TB. Effectiveness and safety of self- managed oral anticoagulant therapy compared with direct oral anticoagulants in patients with atrial fibrillation. Sci Rep. 2018;8. doi:10.1038/s41598-018-33531-7 |
| 1. Guleria S, Kjær SK, Albieri V, Frederiksen K, Jensen A. A Cohort Study of Breast Cancer Risk after 20 Years of Follow-Up of Women Treated with Fertility Drugs. Cancer Epidemiol Biomarkers Prev. 2019;28(12):1986-1992. doi:10.1158/1055-9965.EPI-19-0652 |
| 1. Gundlund A, Xian Y, Peterson ED, et al. Prestroke and Poststroke Antithrombotic Therapy in Patients With Atrial Fibrillation: Results From a Nationwide Cohort. JAMA Netw Open. 2018;1(1):e180171. doi:10.1001/jamanetworkopen.2018.0171 |
| 1. Hallas J, Margulis AV, Pottegård A, et al. Incidence of Common Cancers in Users of Antimuscarinic Medications for Overactive Bladder: A Danish Nationwide Cohort Study. Basic & Clinical Pharmacology & Toxicology. 2018;122(6):612-619. doi:10.1111/bcpt.12965 |
| 1. Hannibal CG, Dehlendorff C, Kjaer SK. Use of paracetamol, low-dose aspirin, or non-aspirin non-steroidal anti-inflammatory drugs and risk of ovarian borderline tumors in Denmark. Gynecologic Oncology. 2018;151(3):513-518. doi:10.1016/j.ygyno.2018.09.022 |
| 1. Hansen PW, Sehested TSG, Fosbøl EL, et al. Trends in warfarin use and its associations with thromboembolic and bleeding rates in a population with atrial fibrillation between 1996 and 2011. PLoS One. 2018;13(3). doi:10.1371/journal.pone.0194295 |
| 1. Hargreave M, Jensen A, Hansen MK, et al. Association Between Fertility Treatment and Cancer Risk in Children. JAMA. 2019;322(22):2203-2210. doi:10.1001/jama.2019.18037 |
| 1. Hargreave M, Mørch LS, Andersen KK, Winther JF, Schmiegelow K, Kjaer SK. Maternal use of hormonal contraception and risk of childhood leukaemia: a nationwide, population-based cohort study. Lancet Oncology. 2018;19(10):1307-1314. doi:10.1016/S1470-2045(18)30479-0 |
| 1. Hellfritzsch M, Lund LC, Ennis Z, et al. Ischemic Stroke and Systemic Embolism in Warfarin Users With Atrial Fibrillation or Heart Valve Replacement Exposed to Dicloxacillin or Flucloxacillin. Clinical Pharmacology & Therapeutics. 2020;107(3):607-616. doi:10.1002/cpt.1662 |
| 1. Hellfritzsch M, Rasmussen L, Hallas J, Pottegård A. Using the Symmetry Analysis Design to Screen for Adverse Effects of Non-vitamin K Antagonist Oral Anticoagulants. Drug Safety: An International Journal of Medical Toxicology and Drug Experience. 2018;41(7):685-695. doi:10.1007/s40264-018-0650-6 |
| 1. Hertz FB, Jensen A, Knudsen JD, et al. Does macrolide use confer risk of out-of-hospital cardiac arrest compared with penicillin V? A Danish national case-crossover and case–time– control study. BMJ Open. 2018;8(2). doi:10.1136/bmjopen-2017-019997 |
| 1. Hicks BM, Kristensen KB, Pedersen SA, Hölmich LR, Pottegård A. Hormone replacement therapy and the risk of melanoma in post-menopausal women. Human Reproduction. 2019;34(12):2418-2429. doi:10.1093/humrep/dez222 |
| 1. Hjalgrim H, Søegaard SH, Hjalgrim LL, Rostgaard K. Childhood use of antimicrobials and risk of Hodgkin lymphoma: a Danish register–based cohort study. Blood Adv. 2019;3(9):1489-1492. doi:10.1182/bloodadvances.2018029355 |
| 1. Højgaard P, Ballegaard C, Cordtz R, et al. Gender differences in biologic treatment outcomes—a study of 1750 patients with psoriatic arthritis using Danish Health Care Registers. Rheumatology. 2018;57(9):1651-1660. doi:10.1093/rheumatology/key140 |
| 1. Holland-Bill L, Christiansen CF, Ulrichsen SP, Ring T, Jørgensen JOL, Sørensen HT. Preadmission Diuretic Use and Mortality in Patients Hospitalized With Hyponatremia: A Propensity Score–Matched Cohort Study. American Journal of Therapeutics. Published online 2019:13. |
| 1. Holm M, Olsen A, Yeung SA, et al. Pattern of mortality after menopausal hormone therapy: long-term follow up in a population-based cohort. BJOG: An International Journal of Obstetrics & Gynaecology. 2019;126(1):55-63. doi:10.1111/1471-0528.15433 |
| 1. Hopfner F, Wod M, Höglinger GU, et al. Use of β2-adrenoreceptor agonist and antagonist drugs and risk of Parkinson disease. Neurology. 2019;93(2):e135-e142. |
| 1. Horwitz H, Andersen JT, Dalhoff KP. Health consequences of androgenic anabolic steroid use. Journal of Internal Medicine. 2019;285(3):333-340. doi:10.1111/joim.12850 |
| 1. Hviid A, Svanström H, Scheller NM, Grönlund O, Pasternak B, Arnheim‐Dahlström L. Human papillomavirus vaccination of adult women and risk of autoimmune and neurological diseases. Journal of Internal Medicine. 2018;283(2):154-165. doi:10.1111/joim.12694 |
| 1. Hviid A, Hansen JV, Frisch M, Melbye M. Measles, Mumps, Rubella Vaccination and Autism. Ann Intern Med. 2019;170(8):513-520. doi:10.7326/M18-2101 |
| 1. Inghammar M, Nibell O, Pasternak B, Melbye M, Svanström H, Hviid A. Long-Term Risk of Cardiovascular Death With Use of Clarithromycin and Roxithromycin: A Nationwide Cohort Study. American Journal of Epidemiology. 2018;187(4):777-785. doi:10.1093/aje/kwx359 |
| 1. Jantzen C, Madsen CM, Abrahamsen B, et al. Pre-fracture medication use as a predictor of 30- day mortality in hip fracture patients: an analysis of 141,201 patients. HIP International. 2020;30(1):101-106. doi:10.1177/1120700019832603 |
| 1. Jennum P, Baandrup L, Tønnesen P, Ibsen R, Kjellberg J. Mortality and use of psychotropic medication in sleep apnoea patients: a population-wide register-based study. Sleep Medicine. 2018;43:19-24. doi:10.1016/j.sleep.2017.11.1142 |
| 1. Jensen A, Andersen PK, Stensballe LG. Early childhood vaccination and subsequent mortality or morbidity: are observational studies hampered by residual confounding? A Danish register- based cohort study. BMJ Open. 2019;9(9). doi:10.1136/bmjopen-2019-029794 |
| 1. Jensen LS, Overgaard C, Garne JP, Bøggild H, Fonager K. The impact of prior psychiatric medical treatment on return to work after a diagnosis of breast cancer: A registry based study. Scand J Public Health. 2019;47(5):519-527. doi:10.1177/1403494817722291 |
| 1. Jensen MH, Vestergaard P. Hypoglycaemia and type 1 diabetes are associated with an increased risk of fractures. Osteoporosis International. 2019;30(8):1663-1670. doi:10.1007/s00198-019-05014-6 |
| 1. Jensen M-B, Krarup JF, Palshof T, Mouridsen HT, Ejlertsen B. Two years of tamoxifen or no adjuvant systemic therapy for patients with high-risk breast cancer: long-term follow-up of the Copenhagen breast cancer trial. Acta Oncologica. 2018;57(1):26-30. doi:10.1080/0284186X.2017.1400179 |
| 1. Jess T, Morgen CS, Harpsøe MC, et al. Antibiotic use during pregnancy and childhood overweight: A population-based nationwide cohort study. Sci Rep. 2019;9. doi:10.1038/s41598-019-48065-9 |
| 1. Juul MB, Jensen PH, Engberg H, et al. Treatment strategies and outcomes in diffuse large B-cell lymphoma among 1011 patients aged 75 years or older: A Danish population-based cohort study. European Journal of Cancer. 2018;99:86-96. doi:10.1016/j.ejca.2018.05.006 |
| 1. Kaspersen KA, Dinh KM, Mikkelsen S, et al. Oral iron supplementation is not associated with short-term risk of infections: results from the Danish Blood Donor Study. Transfusion. 2019;59(6):2030-2038. doi:https://doi.org/10.1111/trf.15221 |
| 1. Keilow M, Holm A, Fallesen P. Medical treatment of Attention Deficit/Hyperactivity Disorder (ADHD) and children’s academic performance. PLoS One. 2018;13(11). doi:10.1371/journal.pone.0207905 |
| 1. Kessing L v., Rytgaard HC, Gerds TA, Berk M, Ekstrøm CT, Andersen PK. New drug candidates for depression – a nationwide population‐based study. Acta Psychiatrica Scandinavica. 2019;139(1):68-77. doi:10.1111/acps.12957 |
| 1. Kessing LV, Rytgaard HC, Gerds TA, Berk M, Ekstrøm CT, Andersen PK. New drug candidates for bipolar disorder—A nation‐wide population‐based study. Bipolar Disorders. 2019;21(5):410-418. doi:10.1111/bdi.12772 |
| 1. Kirkegård J, Lund JL, Mortensen FV, Cronin‐Fenton D. Statins and pancreatic cancer risk in patients with chronic pancreatitis: A Danish nationwide population-based cohort study. International Journal of Cancer. 2020;146(3):610-616. doi:10.1002/ijc.32264 |
| 1. Kjærulff TM, Ersbøll AK, Green A, et al. Finasteride Use and Risk of Male Breast Cancer: A Case–Control Study Using Individual-Level Registry Data from Denmark, Finland, and Sweden. Cancer Epidemiol Biomarkers Prev. 2019;28(5):980-986. doi:10.1158/1055-9965.EPI- 18-0904 |
| 1. Köhler-Forsberg O, Gasse C, Petersen L, Nierenberg AA, Mors O, Østergaard SD. Statin treatment and the risk of depression. Journal of Affective Disorders. 2019;246:706-715. doi:10.1016/j.jad.2018.12.110 |
| 1. Köhler-Forsberg O, Petersen L, Gasse C, et al. A Nationwide Study in Denmark of the Association Between Treated Infections and the Subsequent Risk of Treated Mental Disorders in Children and Adolescents. JAMA Psychiatry. 2019;76(3):271-279. doi:10.1001/jamapsychiatry.2018.3428 |
| 1. Korzenik J, Larsen MD, Nielsen J, Kjeldsen J, Nørgård BM. Increased risk of developing Crohn’s disease or ulcerative colitis in 17 018 patients while under treatment with anti‐TNFα agents, particularly etanercept, for autoimmune diseases other than inflammatory bowel disease. Alimentary Pharmacology & Therapeutics. 2019;50(3):289-294. doi:10.1111/apt.15370 |
| 1. Kragholm K, Andersen MP, Mortensen RN, et al. Exposure to selective serotonin reuptake inhibitors in utero and early elementary school outcomes. Acta Psychiatrica Scandinavica. 2018;137(6):481-490. doi:10.1111/acps.12867 |
| 1. Kremke M, Gissel MS, Jensen MJ, Thomassen SA, Jakobsen C-J. The association between a three-day ticagrelor discontinuation and perioperative bleeding complications. European Journal of Cardio-Thoracic Surgery. 2019;55(4):714-720. doi:10.1093/ejcts/ezy355 |
| 1. Kristensen B, Ejlertsen B, Jensen M-B, Mouridsen HT. The occurrence of fractures after adjuvant treatment of breast cancer: a DBCG register study. Acta Oncologica. 2018;57(1):141-145. doi:10.1080/0284186X.2017.1403043 |
| 1. Kristensen KB, Jensen PH, Skriver C, Friis S, Pottegård A. Use of vitamin K antagonists and risk of prostate cancer: Meta–analysis and nationwide case–control study. International Journal of Cancer. 2019;144(7):1522-1529. doi:https://doi.org/10.1002/ijc.31886 |
| 1. Kristensen KB, Pedersen SA, Schmidt SAJ, Pottegård A. Use of antiepileptic drugs and risk of skin cancer: A nationwide case-control study. Journal of the American Academy of Dermatology. 2020;82(2):326-335. doi:10.1016/j.jaad.2019.05.055 |
| 1. Kristensen MS, Kjærulff TM, Ersbøll AK, Green A, Hallas J, Thygesen LC. The Influence of Antidepressants on the Disease Course Among Patients With Crohn’s Disease and Ulcerative Colitis—A Danish Nationwide Register–Based Cohort Study. Inflamm Bowel Dis. 2019;25(5):886-893. doi:10.1093/ibd/izy367 |
| 1. Kristensen ML, Simonsen JH, Torp‐Pedersen C, Vorum H, Aasbjerg K. Pulmonary safety of ophthalmic beta‐blockers: a nationwide registry‐based cohort study. Acta Ophthalmologica (1755375X). 2018;96(7):705-711. doi:10.1111/aos.13663 |
| 1. Kugathasan P, Horsdal HT, Aagaard J, Jensen SE, Laursen TM, Nielsen RE. Association of Secondary Preventive Cardiovascular Treatment After Myocardial Infarction With Mortality Among Patients With Schizophrenia. JAMA Psychiatry. 2018;75(12):1234-1240. |
| 1. Larsen MD, Friedman S, Magnussen B, Nørgård BM. Birth Outcome of Children Fathered by Men Treated with Systemic Corticosteroids during the Conception Period - A Cohort Study based on Nationwide Data. Basic & Clinical Pharmacology & Toxicology. 2018;122(1):133-138. doi:10.1111/bcpt.12857 |
| 1. Laugesen EK, Staerk L, Carlson N, et al. Non-vitamin K antagonist oral anticoagulants vs. vitamin-K antagonists in patients with atrial fibrillation and chronic kidney disease: a nationwide cohort study. Thromb J. 2019;17. doi:10.1186/s12959-019-0211-y |
| 1. Laugesen K, Petersen I, Sørensen HT, Jørgensen JOL. Clinical indicators of adrenal insufficiency following discontinuation of oral glucocorticoid therapy: A Danish population- based self-controlled case series analysis. PLoS One. 2019;14(2). doi:10.1371/journal.pone.0212259 |
| 1. Lee CJ-Y, Gerds TA, Carlson N, et al. Risk of Myocardial Infarction in Anticoagulated Patients With Atrial Fibrillation. Journal of the American College of Cardiology. 2018;72(1):17-26. doi:10.1016/j.jacc.2018.04.036 |
| 1. Li L, Wang Z, Liang H, et al. Risk of childhood cerebral palsy following prenatal exposure to ß2-adrenergic receptor agonist: A nationwide cohort study. PLoS One. 2018;13(8). doi:10.1371/journal.pone.0202078 |
| 1. Liew Z, Olsen J, Nohr EA, Ritz B. Pre-conceptual and Prenatal Supplementary Folic Acid and Multivitamin Intake, Behavioral Problems and Hyperkinetic Disorders, A Study Based on the Danish National Birth Cohort (DNBC). Nutr Neurosci. 2018;21(5):352-360. doi:10.1080/1028415X.2017.1290932 |
| 1. Lillevang-Johansen M, Abrahamsen B, Jørgensen HL, Brix TH, Hegedüs L. Over- and Under- Treatment of Hypothyroidism Is Associated with Excess Mortality: A Register-Based Cohort Study. Thyroid. 2018;28(5):566-574. doi:10.1089/thy.2017.0517 |
| 1. Løkkegaard ECL, Mørch LS. Tibolone and risk of gynecological hormone sensitive cancer. International Journal of Cancer. 2018;142(12):2435-2440. doi:10.1002/ijc.31267 |
| 1. Lund K, Larsen MD, Knudsen T, Kjeldsen J, Nielsen RG, Nørgård BM. The impact of anti‐ TNFα therapy on colectomy rates and corticosteroid treatment among 3001 paediatric and adolescent patients with ulcerative colitis—a nationwide study from 1995 to 2015. Alimentary Pharmacology & Therapeutics. 2019;50(10):1077-1085. doi:10.1111/apt.15510 |
| 1. Lund M, Svanström H, Pasternak B, Hviid A, Melbye M. Concomitant use of statins and macrolide antibiotics and risk of serious renal events: A nationwide cohort study. International Journal of Cardiology. 2018;269:310-316. doi:10.1016/j.ijcard.2018.06.110 |
| 1. Lycke KD, Christiansen CF, Lund JL, Iversen LH, Nørgaard M. Preadmission use of antidepressants and risk of complications and death after colorectal cancer surgery: a nationwide population-based cohort study. Colorectal Disease. 2019;21(6):651-662. doi:10.1111/codi.14579 |
| 1. Madelaire C, Gislason G, Kristensen SL, et al. Low-Dose Aspirin in Heart Failure Not Complicated by Atrial Fibrillation: A Nationwide Propensity-Matched Study. JACC: Heart Failure. 2018;6(2):156-167. doi:10.1016/j.jchf.2017.09.021 |
| 1. Mannisto S, Vähämurto P, Pollari M, et al. Intravenous but not intrathecal central nervous system–directed chemotherapy improves survival in patients with testicular diffuse large B-cell lymphoma. European Journal of Cancer. 2019;115:27-36. doi:10.1016/j.ejca.2019.04.004 |
| 1. Marcussen M, Polcwiartek C, Mills EHA, et al. Abnormal serum potassium levels and 6-month all-cause mortality in patients co-treated with antipsychotic and diuretic drugs – A Danish register-based cohort study. European Neuropsychopharmacology. 2018;28(9):1006-1014. doi:10.1016/j.euroneuro.2018.06.008 |
| 1. Margulis AV, Hallas J, Pottegård A, et al. Comparison of cardiovascular events among treatments for overactive bladder: a Danish nationwide cohort study. European Journal of Clinical Pharmacology. 2018;74(2):193-199. doi:10.1007/s00228-017-2359-3 |
| 1. Martinsson A, Li X, Torp-Pedersen C, et al. Outcomes associated with dual antiplatelet therapy after myocardial infarction in patients with aortic stenosis. Int J Cardiol. 2019;281:140-145. doi:10.1016/j.ijcard.2019.01.063 |
| 1. Meijer M, Thygesen LC, Green A, et al. Finasteride treatment and male breast cancer: a register‐based cohort study in four Nordic countries. Cancer Med. 2017;7(1):254-260. doi:10.1002/cam4.1273 |
| 1. Modin D, Jørgensen ME, Gislason G, et al. Influenza Vaccine in Heart Failure: Cumulative Number of Vaccinations, Frequency, Timing, and Survival: A Danish Nationwide Cohort Study. Circulation. 2019;139(5):575-586. doi:10.1161/CIRCULATIONAHA.118.036788 |
| 1. Mohr-Jensen C, Müller Bisgaard C, Boldsen SK, Steinhausen H-C. Attention- Deficit/Hyperactivity Disorder in Childhood and Adolescence and the Risk of Crime in Young Adulthood in a Danish Nationwide Study. Journal of the American Academy of Child & Adolescent Psychiatry. 2019;58(4):443-452. doi:10.1016/j.jaac.2018.11.016 |
| 1. Mølgaard‐Nielsen D, Fischer TK, Krause TG, Hviid A. Effectiveness of maternal immunization with trivalent inactivated influenza vaccine in pregnant women and their infants. Journal of Internal Medicine. 2019;286(4):469-480. doi:10.1111/joim.12947 |
| 1. Munch T, Christiansen CF, Pedersen L, Sørensen HT. Impact of Preadmission Opioid Treatment on 1-Year Mortality Following Nonsurgical Intensive Care. Crit Care Med. 2018;46(6):860-868. |
| 1. Nielsen AO, Pedersen L, Sode BF, Dahl M. β-Blocker Therapy and Risk of Chronic Obstructive Pulmonary Disease – A Danish Nationwide Study of 1·3 Million Individuals. EClinicalMedicine. 2019;7:21-26. doi:10.1016/j.eclinm.2019.01.004 |
| 1. Nielsen DV, Torp-Pedersen C, Skals RK, Gerds TA, Karaliunaite Z, Jakobsen C-J. Intraoperative milrinone versus dobutamine in cardiac surgery patients: a retrospective cohort study on mortality. Crit Care. 2018;22. doi:10.1186/s13054-018-1969-1 |
| 1. Nielsen RE, Valentin JB, Lolk A, Andersen K. Effects of Antipsychotics on Secular Mortality Trends in Patients With Alzheimer’s Disease. J Clin Psychiatry. 2018;79(3):0-0. doi:10.4088/JCP.17m11595 |
| 1. Nørgaard JM, Mølle I, Kjeldsen E, et al. Addressing the room for improvement in management of acute promyelocytic leukemia. European Journal of Haematology. 2019;102(6):479-485. doi:10.1111/ejh.13229 |
| 1. Nymand Ennis Z, Arnspang Pedersen S, Rix Hansen M, et al. Use of phthalate-containing prescription drugs and the risk of gastric cancer: a Danish nationwide case-control study. Acta Oncologica. 2019;58(6):852-858. doi:10.1080/0284186X.2019.1585941 |
| 1. Oshagbemi OA, Burden AM, Shudofsky KN, et al. Use of high-dose intermittent systemic glucocorticoids and the risk of fracture in patients with chronic obstructive pulmonary disease. Bone. 2018;110:238-243. doi:10.1016/j.bone.2018.02.007 |
| 1. Osler M, Wium‐Andersen MK, Wium‐Andersen IK, Gronemann FH, Jørgensen MB, Rozing MP. Incidence of suicidal behaviour and violent crime following antidepressant medication: a Danish cohort study. Acta Psychiatrica Scandinavica. 2019;140(6):522-531. doi:10.1111/acps.13097 |
| 1. Østgård LSG, Nørgaard M, Pedersen L, et al. NSAID consumption and risk of acute myeloid leukemia: a national population-based case-control study. Cancer Manag Res. 2018;10:5043-5051. doi:10.2147/CMAR.S165498 |
| 1. Øyen N, Olsen SF, Basit S, et al. Association Between Maternal Folic Acid Supplementation and Congenital Heart Defects in Offspring in Birth Cohorts From Denmark and Norway. J Am Heart Assoc. 2019;8(6). doi:10.1161/JAHA.118.011615 |
| 1. Pasternak B, Ueda P, Eliasson B, et al. Use of sodium glucose cotransporter 2 inhibitors and risk of major cardiovascular events and heart failure: Scandinavian register based cohort study. BMJ. 2019;366:l4772. doi:10.1136/bmj.l4772 |
| 1. Pedersen AB, Andersen IT, Overgaard S, et al. Optimal duration of anticoagulant thromboprophylaxis in total hip arthroplasty: new evidence in 55,540 patients with osteoarthritis from the Nordic Arthroplasty Register Association (NARA) group. Acta Orthop. 2019;90(4):298-305. doi:10.1080/17453674.2019.1611215 |
| 1. Pedersen AB, Heide-Jørgensen U, Sørensen HT, Prieto-Alhambra D, Ehrenstein V. Comparison of Risk of Osteoporotic Fracture in Denosumab vs Alendronate Treatment Within 3 Years of Initiation. JAMA Netw Open. 2019;2(4):e192416. |
| 1. Pedersen L, Petronis KR, Nørgaard M, et al. Risk of adverse birth outcomes after maternal varenicline use: A population-based observational study in Denmark and Sweden. Pharmacoepidemiology and Drug Safety. 2020;29(1):94-102. doi:10.1002/pds.4894 |
| 1. Pedersen SA, Gaist D, Schmidt SAJ, Hölmich LR, Friis S, Pottegård A. Hydrochlorothiazide use and risk of nonmelanoma skin cancer: A nationwide case-control study from Denmark. Journal of the American Academy of Dermatology. 2018;78(4):673-681.e9. doi:10.1016/j.jaad.2017.11.042 |
| 1. Pedersen SA, Johannesdottir Schmidt SA, Hölmich LR, Friis S, Pottegård A, Gaist D. Hydrochlorothiazide use and risk for Merkel cell carcinoma and malignant adnexal skin tumors: A nationwide case-control study. Journal of the American Academy of Dermatology. 2019;80(2):460-465.e9. doi:10.1016/j.jaad.2018.06.014 |
| 1. Persson F, Nyström T, Jørgensen ME, et al. Dapagliflozin is associated with lower risk of cardiovascular events and all‐cause mortality in people with type 2 diabetes (CVD‐REAL Nordic) when compared with dipeptidyl peptidase‐4 inhibitor therapy: A multinational observational study. Diabetes Obes Metab. 2018;20(2):344-351. doi:10.1111/dom.13077 |
| 1. Petersen TG, Liew Z, Andersen A-MN, et al. Use of paracetamol, ibuprofen or aspirin in pregnancy and risk of cerebral palsy in the child. Int J Epidemiol. 2018;47(1):121-130. doi:10.1093/ije/dyx235 |
| 1. Pottegård A, Kristensen KB, Ernst MT, Johansen NB, Quartarolo P, Hallas J. Use of N-nitrosodimethylamine (NDMA) contaminated valsartan products and risk of cancer: Danish nationwide cohort study. BMJ. 2018;362:k3851. doi:10.1136/bmj.k385 |
| 1. Pottegård A, Lash TL, Cronin‐Fenton D, Ahern TP, Damkier P. Use of antipsychotics and risk of breast cancer: a Danish nationwide case–control study. Br J Clin Pharmacol. 2018;84(9):2152-2161. doi:10.1111/bcp.13661 |
| 1. Rasmussen ER, Pottegård A, Bygum A, Buchwald C von, Homøe P, Hallas J. Angiotensin II receptor blockers are safe in patients with prior angioedema related to angiotensin-converting enzyme inhibitors – a nationwide registry-based cohort study. Journal of Internal Medicine. 2019;285(5):553-561. doi:10.1111/joim.12867 |
| 1. Ribe AR, Vestergaard CH, Vestergaard M, et al. Statins and Risk of Intracerebral Haemorrhage in a Stroke-Free Population: A Nationwide Danish Propensity Score Matched Cohort Study. EClinicalMedicine. 2019;8:78-84. doi:10.1016/j.eclinm.2019.02.007 |
| 1. Rieckmann A, Hærskjold A, Benn CS, Aaby P, Lange T, Sørup S. Measles, mumps and rubella vs diphtheria–tetanus–acellular-pertussis–inactivated-polio–Haemophilus influenzae type b as the most recent vaccine and risk of early ‘childhood asthma.’ International Journal of Epidemiology. 2019;48(6):2026-2038. doi:10.1093/ije/dyz062 |
| 1. Rieckmann A, Meyle KD, Rod NH, et al. Smallpox and BCG vaccination in childhood and cutaneous malignant melanoma in Danish adults followed from 18 to 49 years. Vaccine. 2019;37(44):6730-6736. doi:10.1016/j.vaccine.2019.09.023 |
| 1. Rohde C, Polcwiartek C, Kragholm K, Ebdrup BH, Siskind D, Nielsen J. Adverse cardiac events in out-patients initiating clozapine treatment: a nationwide register-based study. Acta Psychiatrica Scandinavica. 2018;137(1):47-53. doi:10.1111/acps.12827 |
| 1. Rohde C, Hilker R, Siskind D, Nielsen J. Real-world effectiveness of clozapine for intellectual disability: Results from a mirror-image and a reverse-mirror-image study. J Psychopharmacol. 2018;32(11):1197-1203. doi:10.1177/0269881118783322 |
| 1. Rohde C, Polcwiartek C, Asztalos M, Nielsen J. Effectiveness of Prescription-Based CNS Stimulants on Hospitalization in Patients With Schizophrenia: A Nation-Wide Register Study. Schizophr Bull. 2018;44(1):93-100. doi:10.1093/schbul/sbx043 |
| 1. Rørth R, Fosbøl EL, Mogensen UM, et al. Evidence-Based Therapy and Its Association With Workforce Detachment After First Hospitalization for Heart Failure. JACC: Heart Failure. 2018;6(1):41-48. doi:10.1016/j.jchf.2017.09.019 |
| 1. Ruwald AC, Gislason GH, Vinther M, et al. Importance of beta-blocker dose in prevention of ventricular tachyarrhythmias, heart failure hospitalizations, and death in primary prevention implantable cardioverter-defibrillator recipients: a Danish nationwide cohort study. EP Europace. 2018;20(FI2):f217-f224. doi:10.1093/europace/euy077 |
| 1. Schack A, Link to external site this link will open in a new window, Fransgaard T, Klein MF, Gögenur I. Perioperative Use of Nonsteroidal Anti-inflammatory Drugs Decreases the Risk of Recurrence of Cancer After Colorectal Resection: A Cohort Study Based on Prospective Data. Annals of Surgical Oncology. 2019;26(12):3826-3837. doi:10.1245/s10434-019-07600-8 |
| 1. Schmidt M, Sørensen HT, Pedersen L. Diclofenac use and cardiovascular risks: series of nationwide cohort studies. BMJ. 2018;362:k3426. doi:10.1136/bmj.k3426 |
| 1. Schroeder MK, Juul KV, Mahler B, Nørgaard JP, Rittig S. Desmopressin use in pediatric nocturnal enuresis patients: is there a sex difference in prescription patterns? European Journal of Pediatrics. 2018;177(3):389-394. doi:10.1007/s00431-017-3074-x |
| 1. Sehested TSG, Gerds TA, Fosbøl EL, et al. Long-term use of proton pump inhibitors, dose– response relationship and associated risk of ischemic stroke and myocardial infarction. Journal of Internal Medicine. 2018;283(3):268-281. doi:10.1111/joim.12698 |
| 1. Sehested TSG, Carlson N, Hansen PW, et al. Reduced risk of gastrointestinal bleeding associated with proton pump inhibitor therapy in patients treated with dual antiplatelet therapy after myocardial infarction. European Heart Journal. 2019;40(24):1963-1970. doi:10.1093/eurheartj/ehz104 |
| 1. Sessa M, Mascolo A, D’Agostino B, et al. Relationship Between Gender and the Effectiveness of Montelukast: An Italian/Danish Register-Based Retrospective Cohort Study. Front Pharmacol. 2018;9. doi:10.3389/fphar.2018.0084 |
| 1. Sessa M, Mascolo A, Mortensen RN, et al. Relationship between heart failure, concurrent chronic obstructive pulmonary disease and beta-blocker use: a Danish nationwide cohort study. European Journal of Heart Failure. 2018;20(3):548-556. doi:10.1002/ejhf.1045 |
| 1. Sindet-Pedersen C, Lamberts M, Staerk L, et al. Combining Oral Anticoagulants With Platelet Inhibitors in Patients With Atrial Fibrillation and Coronary Disease. Journal of the American College of Cardiology. 2018;72(15):1790-1800. doi:10.1016/j.jacc.2018.07.054 |
| 1. Sindet-Pedersen C, Staerk L, Pallisgaard JL, et al. Safety and effectiveness of rivaroxaban and apixaban in patients with venous thromboembolism: a nationwide study. European Heart Journal Cardiovascular Pharmacotherapy. 2018;4(4):220-227. doi:10.1093/ehjcvp/pvy021 |
| 1. Singh S, Andersen NN, Andersson M, Loftus J EV, Jess T. Comparison of infliximab with adalimumab in 827 biologic‐naïve patients with Crohn’s disease: a population‐based Danish cohort study. Alimentary Pharmacology & Therapeutics. 2018;47(5):596-604. doi:10.1111/apt.14466 |
| 1. Skajaa N, Szépligeti SK, Horváth-Puhó E, Ghanima W, Hansen J-B, Sørensen HT. Initiation of statins and risk of venous thromboembolism: Population-based matched cohort study. Thrombosis Research. 2019;184:99-104. doi:10.1016/j.thromres.2019.11.003 |
| 1. Skau Rasmussen L, Vittrup B, Ladekarl M, et al. The effect of postoperative gemcitabine on overall survival in patients with resected pancreatic cancer: A nationwide population-based Danish register study. Acta Oncologica. 2019;58(6):864-871. doi:10.1080/0284186X.2019.1581374 |
| 1. Skovlund CW, Mørch LS, Kessing LV, Lange T, Lidegaard Ø. Association of Hormonal Contraception With Suicide Attempts and Suicides. AJP. 2017;175(4):336-342. doi:10.1176/appi.ajp.2017.17060616 |
| 1. Skriver C, Dehlendorff C, Borre M, et al. Use of Low-Dose Aspirin and Mortality After Prostate Cancer Diagnosis. Ann Intern Med. 2019;170(7):443-452. doi:10.7326/M17-3085 |
| 1. Skriver C, Dehlendorff C, Borre M, et al. Associations of low-dose aspirin or other NSAID use with prostate cancer risk in the Danish Diet, Cancer and Health Study. Cancer Causes Control. 2020;31(2):139-151. doi:10.1007/s10552-019-01252-5 |
| 1. Smedegaard L, Charlot MG, Gislason GH, Hansen PR. Temporal trends in acute myocardial infarction presentation and association with use of cardioprotective drugs: a nationwide registry- based study. European Heart Journal - Cardiovascular Pharmacotherapy. 2018;4(2):93-101. doi:10.1093/ehjcvp/pvx016 |
| 1. Søgaard M, Nielsen PB, Skjøth F, Kjældgaard JN, Coleman CI, Larsen TB. Rivaroxaban Versus Warfarin and Risk of Post-Thrombotic Syndrome Among Patients with Venous Thromboembolism. The American Journal of Medicine. 2018;131(7):787-794.e4. doi:10.1016/j.amjmed.2018.01.041 |
| 1. Søgaard M, Nielsen PB, Skjøth F, Kjældgaard JN, Larsen TB. Risk of recurrence and bleeding in patients with cancer‐associated venous thromboembolism treated with rivaroxaban: A nationwide cohort study. Cancer Med. 2019;8(3):1044-1053. doi:10.1002/cam4.1997 |
| 1. Søgaard M, Skjøth F, Jensen M, et al. Nonvitamin K Antagonist Oral Anticoagulants Versus Warfarin in Atrial Fibrillation Patients and Risk of Dementia: A Nationwide Propensity‐ Weighted Cohort Study. J Am Heart Assoc. 2019;8(11). doi:10.1161/JAHA.118.011358 |
| 1. Sørup S, Jensen AKG, Aaby P, Benn CS. Revaccination With Measles-Mumps-Rubella Vaccine and Infectious Disease Morbidity: A Danish Register-based Cohort Study. Clinical Infectious Diseases. 2019;68(2):282-290. doi:10.1093/cid/ciy433 |
| 1. Sperling CD, Kjaer SK, Hargreave M, Jensen A. Risk of juvenile idiopathic arthritis among children conceived after fertility treatment: a nationwide registry-based cohort study. Human Reproduction. 2019;34(6):1139-1145. doi:10.1093/humrep/dez035 |
| 1. Sperling CD, Verdoodt F, Hansen MK, Dehlendorff C, Friis S, Kjaer SK. Statin use and mortality among endometrial cancer patients: a Danish nationwide cohort study. International Journal of Cancer. 2018;143(11):2668-2676. doi:10.1002/ijc.31625 |
| 1. Staerk L, Gerds TA, Lip GYH, et al. Standard and reduced doses of dabigatran, rivaroxaban and apixaban for stroke prevention in atrial fibrillation: a nationwide cohort study. Journal of Internal Medicine. 2018;283(1):45-55. doi:10.1111/joim.12683 |
| 1. Staerk L, Fosbøl EL, Lamberts M, et al. Resumption of oral anticoagulation following traumatic injury and risk of stroke and bleeding in patients with atrial fibrillation: a nationwide cohort study. European Heart Journal. 2018;39(19):1698-1705a. doi:10.1093/eurheartj/ehx598 |
| 1. Steffensen EH, Cary C, Jensen JB, Larsson H, Weiner M, Nørgaard M. Preadmission antidepressant use and bladder cancer: a population-based cohort study of stage at diagnosis, time to surgery, and surgical outcomes. BMC Cancer. 2018;18. doi:10.1186/s12885-018-4939-8 |
| 1. Stokholm L, Juhl M, Lønfeldt NN, Mikkelsen SH, Obel C, Strandberg‐Larsen K. Obstetric synthetic oxytocin use and subsequent hyperactivity/inattention problems in Danish children. Acta Obstetricia et Gynecologica Scandinavica. 2018;97(7):880-889. doi:10.1111/aogs.13344 |
| 1. Sundbøll J, Darvalics B, Horváth‐Puhó E, et al. Preadmission use of glucocorticoids and risk of cardiovascular events in patients with ischemic stroke. Journal of Thrombosis & Haemostasis. 2018;16(11):2175-2183. doi:10.1111/jth.14283 |
| 1. Svanström H, Lund M, Melbye M, Pasternak B. Concomitant use of low-dose methotrexate and NSAIDs and the risk of serious adverse events among patients with rheumatoid arthritis. Pharmacoepidemiology and Drug Safety. 2018;27(8):885-893. doi:10.1002/pds.4555 |
| 1. Svanström H, Lund M, Melbye M, Pasternak B. Use of Proton Pump Inhibitors and the Risk of Acute Kidney Injury Among Patients with Rheumatoid Arthritis: Cohort Study. Drug Safety: An International Journal of Medical Toxicology and Drug Experience. 2018;41(8):817-826. doi:10.1007/s40264-018-0663-1 |
| 1. Svanström H, Ueda P, Melbye M, et al. Use of liraglutide and risk of major cardiovascular events: a register-based cohort study in Denmark and Sweden. The Lancet Diabetes & Endocrinology. 2019;7(2):106-114. doi:10.1016/S2213-8587(18)30320-6 |
| 1. Thamsborg LH, Napolitano G, Larsen LG, Lynge E. Impact of HPV vaccination on outcome of cervical cytology screening in Denmark—A register‐based cohort study. Int J Cancer. 2018;143(7):1662-1670. doi:10.1002/ijc.31568 |
| 1. Thomsen AML, Liew Z, Riis AH, et al. Nitrosatable drug exposure during pregnancy and risk of stillbirth. Pharmacoepidemiology and Drug Safety. 2019;28(9):1204-1210. doi:https://doi.org/10.1002/pds.4867 |
| 1. Thomseth V, Cejvanovic V, Jimenez‐Solem E, Poulsen HE, Utheim TP, Andersen JT. Exposure to antazoline‐naphazoline eye drops during pregnancy and the risk of congenital malformations: a Danish nationwide cohort study. Acta Ophthalmologica (1755375X). 2019;97(5):505-509. doi:10.1111/aos.13980 |
| 1. Thorsteinsson A-L, Hansen L, Vestergaard P, Eiken P. Long-term benefits and risks of parathyroid hormone treatment in compliant osteoporotic patients. A Danish national register based cohort study. Arch Osteoporos. 2018;13(1):50. doi:10.1007/s11657-018-0444-6 |
| 1. Thyssen JP, Corn G, Wohlfahrt J, Melbye M, Bager P. Retrospective markers of paediatric atopic dermatitis persistence after hospital diagnosis: A nationwide cohort study. Clinical & Experimental Allergy. 2019;49(11):1455-1463. doi:10.1111/cea.13487 |
| 1. Tvingsholm SA, Dehlendorff C, Østerlind K, Friis S, Jäättelä M. Proton pump inhibitor use and cancer mortality. International Journal of Cancer. 2018;143(6):1315-1326. doi:10.1002/ijc.31529 |
| 1. Ueda P, Svanström H, Melbye M, et al. Sodium glucose cotransporter 2 inhibitors and risk of serious adverse events: nationwide register based cohort study. BMJ. 2018;363:k4365. doi:10.1136/bmj.k4365 |
| 1. Ungaro RC, Limketkai BN, Jensen CB, et al. Stopping 5-aminosalicylates in patients with ulcerative colitis starting biologic therapy does not increase the risk of adverse clinical outcomes: analysis of two nationwide population-based cohorts. Gut. 2019;68(6):977-984. doi:10.1136/gutjnl-2018-317021 |
| 1. Verdoodt F, Dehlendorff C, Friis S, Kjaer SK. Non-aspirin NSAID use and ovarian cancer mortality. Gynecologic Oncology. 2018;150(2):331-337. doi:10.1016/j.ygyno.2018.06.018 |
| 1. Verdoodt F, Kjaer SK, Dehlendorff C, Friis S. Aspirin use and ovarian cancer mortality in a Danish nationwide cohort study. Br J Cancer. 2018;118(4):611-615. doi:10.1038/bjc.2017.449 |
| 1. Verdoodt F, Pottegård A, Dehlendorff C, et al. Antihistamine use and risk of ovarian cancer: A population-based case-control study. Maturitas. 2019;120:47-52. doi:10.1016/j.maturitas.2018.11.014 |
| 1. Waljee AK, Higgins PDR, Jensen CB, et al. Anti-tumour necrosis factor-α therapy and recurrent or new primary cancers in patients with inflammatory bowel disease, rheumatoid arthritis, or psoriasis and previous cancer in Denmark: a nationwide, population-based cohort study. The Lancet Gastroenterology & Hepatology. 2020;5(3):276-284. doi:10.1016/S2468-1253(19)30362-0 |
| 1. Wedel C, Møller CM, Budtz-Lilly J, Eldrup N. Red blood cell transfusion associated with increased morbidity and mortality in patients undergoing elective open abdominal aortic aneurysm repair. PLoS One. 2019;14(7). doi:10.1371/journal.pone.0219263 |
| 1. Weeke PE, Kellemann JS, Jespersen CB, et al. Long-term proarrhythmic pharmacotherapy among patients with congenital long QT syndrome and risk of arrhythmia and mortality. European Heart Journal. 2019;40(37):3110-3117. doi:10.1093/eurheartj/ehz228 |
| 1. Winkel JS, Damkier P, Hallas J, Henriksen DP. Treatment with montelukast and antidepressive medication—a symmetry analysis. Pharmacoepidemiology and Drug Safety. 2018;27(12):1409-1415. doi:10.1002/pds.4638 |
| 1. Wintzell V, Svanström H, Melbye M, et al. Use of tumour necrosis factor-α inhibitors and the risk of serious infection in paediatric inflammatory bowel disease in Denmark: a nationwide cohort study. The Lancet Gastroenterology & Hepatology. 2019;4(11):845-853. doi:10.1016/S2468-1253(19)30266-3 |
| 1. Wintzell V, Svanström H, Olén O, Melbye M, Ludvigsson JF, Pasternak B. Association between use of azathioprine and risk of acute pancreatitis in children with inflammatory bowel disease: a Swedish–Danish nationwide cohort study. The Lancet Child & Adolescent Health. 2019;3(3):158-165. doi:10.1016/S2352-4642(18)30401-2 |
| 1. Wium-Andersen IK, Osler M, Jørgensen MB, Rungby J, Wium-Andersen MK. Antidiabetic medication and risk of dementia in patients with type 2 diabetes: a nested case–control study. European Journal of Endocrinology. 2019;181(5):499-507. doi:10.1530/EJE-19-0259 |
| 1. Wod M, Hallas J, Andersen K, García Rodríguez LA, Christensen K, Gaist D. Lack of Association Between Proton Pump Inhibitor Use and Cognitive Decline. Clinical Gastroenterology and Hepatology. 2018;16(5):681-689. doi:10.1016/j.cgh.2018.01.034 |
| 1. Würtz M, Schmidt M, Grove EL, et al. Pre-admission use of platelet inhibitors and short-term stroke mortality: a population-based cohort study. Eur Heart J Cardiovasc Pharmacother. 2018;4(3):158-165. doi:10.1093/ehjcvp/pvy010 |
| 1. Yang F, Liang H, Chen J, et al. Prenatal Paternal Selective Serotonin Reuptake Inhibitors Use and Risk of ADHD in Offspring. Pediatrics. 2018;141(1). doi:10.1542/peds.2017-1081 |
| 1. Yang F, Yuan W, Liang H, et al. Preconceptional paternal antiepileptic drugs use and risk of congenital anomalies in offspring: a nationwide cohort study. European Journal of Epidemiology. 2019;34(7):651-660. doi:10.1007/s10654-019-00509-2 |

# **Table S4** Study overview of included studies.

| **Study characteristics** | **N (210)** |
| --- | --- |
| **Study design** |  |
| *Cohort study* | 138 |
| *Case-control study* | 15 |
| *Nested case-control study* | 10 |
| *Case-cohort study* | 4 |
| *Nested case-cohort study* | 1 |
| *Case-crossover study* | 2 |
| *RCT* | 2 |
| *Other designs or not specified* | 42 |
| **Patient enrolment_start** | 1965 – 2016 |
| **Patient enrolment_end** | 1976 – 2018 |
| **Request** |  |
| *Reported*  *EMA*  *FDA* | 5 |
| 4 |
| 1 |
| *Not reported* | 205 |

**Notes:** “Patient enrolment” was defined as the first stated timeframe defining the population. “Request” refers to if the study specified that it was performed based on a request from the European Medicines Agency (EMA), the U.S. Food and Drug Administration (FDA), or Other. As more than one study design may be applied in one study, the total number of study designs are not equal to the total number of studies.

# **Table S5** Overview of diagnosis categories reported in the 138 studies using “Diagnosis” as outcome subcategory

| **Diagnosis code category** | **N (138)** | **%** |
| --- | --- | --- |
| Certain infectious and parasitic diseases | 8 | 6 |
| Neoplasms | 32 | 23 |
| Diseases of the blood and blood-forming organs and certain disorders involving the immune mechanism | 19 | 14 |
| Endocrine, nutritional, and metabolic diseases | 12 | 9 |
| Mental and behavioral disorders | 11 | 8 |
| Diseases of the nervous system | 26 | 19 |
| Diseases of the eye and adnexa | 17 | 12 |
| Diseases of the ear and mastoid process | 8 | 6 |
| Diseases of the circulatory system | 60 | 43 |
| Diseases of the respiratory system | 28 | 20 |
| Diseases of the digestive system | 36 | 26 |
| Diseases of the skin and subcutaneous tissue | 8 | 6 |
| Diseases of the musculoskeletal system and connective tissue | 10 | 7 |
| Diseases of the genitourinary system | 30 | 22 |
| Pregnancy, childbirth, and the puerperium | 2 | 1 |
| Certain conditions originating in the perinatal period | 1 | 1 |
| Symptoms, signs, and abnormal clinical and laboratory findings, not elsewhere classified | 22 | 16 |
| Injury, poisoning and certain other consequences of external causes | 26 | 19 |
| External causes of morbidity and mortality | 5 | 4 |
| Factors influencing health status and contact with health services | 1 | 1 |
| Other | 9 | 7 |

**Notes:** The diagnosis code categories are based on the International Statistical Classification of Diseases, 10th Revision (ICD-10). The category “Other” include studies where information on the ICD-10 (or ICD-8) codes used not was specified/available, and studies using an alternative definition of diagnosis. An alternative definition could be based on laboratory results coded using the Danish version of the Systematized Nomenclature of Medicine (SNOMED).
